# Supplementary material for: First Optimization of Novel, Potent, Selective PDE11A4 Inhibitors for Age-Related Cognitive Decline
Source: PubMed Central journal article supplement (PMC10641827; doi:10.1021/acs.jmedchem.3c01088), 2023-10-20
Supplement: jm3c01088_si_001.pdf [file jm3c01088_si_001.pdf]

## Supplementary Information

### The First Optimization of Novel, Potent, Selective PDE11A4 Inhibitors for Age-Related Cognitive Decline

Shams ul Mahmood<sup>1,5</sup>, Mariana Lozano Gonzalez<sup>1,5+</sup>, Sreedhar Tummalapalli<sup>1,5+</sup>, Jeremy Eberhard<sup>2</sup>, Judy Ly<sup>2</sup>, Charles S. Hoffman<sup>2</sup>, Michy P. Kelly<sup>3</sup>, John Gordon<sup>4</sup>, Dennis Colussi<sup>4</sup>, Wayne Childers<sup>4</sup>, David P. Rotella<sup>\*1,5</sup>

<sup>1</sup>Department of Chemistry & Biochemistry, Montclair State University, Montclair, NJ 07043, <sup>2</sup>Biology Department, Boston College, Chestnut Hill MA, 02467, <sup>3</sup>Department of Anatomy & Neurobiology, School of Medicine, University of Maryland, Baltimore MD 21201, <sup>4</sup>Moulder Center for Drug Discovery Research, Temple University, Philadelphia PA 19140. <sup>5</sup>Sokol Institute of Pharmaceutical Life Sciences, Montclair State University, Montclair NJ 07043

#### Index

- 1) Proton NMR pages S2-S17
- 2) HPLC pages S17-S32
- 3) Mass spectrum of compound **25** page S33
- 4) Expanded PDE selectivity of **14b** and **23b** pages S34
- 5) Protein expression and cell viability in cell-based assay pages S35-S36

# Proton NMR and HPLC data of Final Compounds

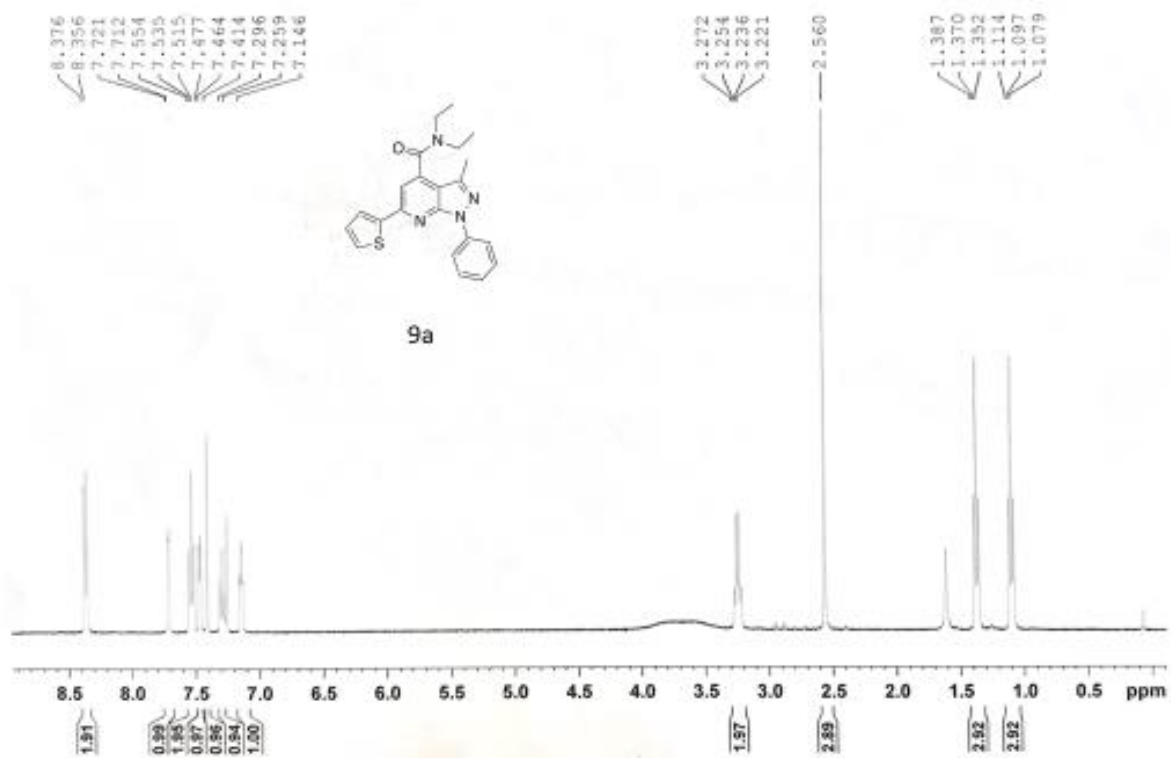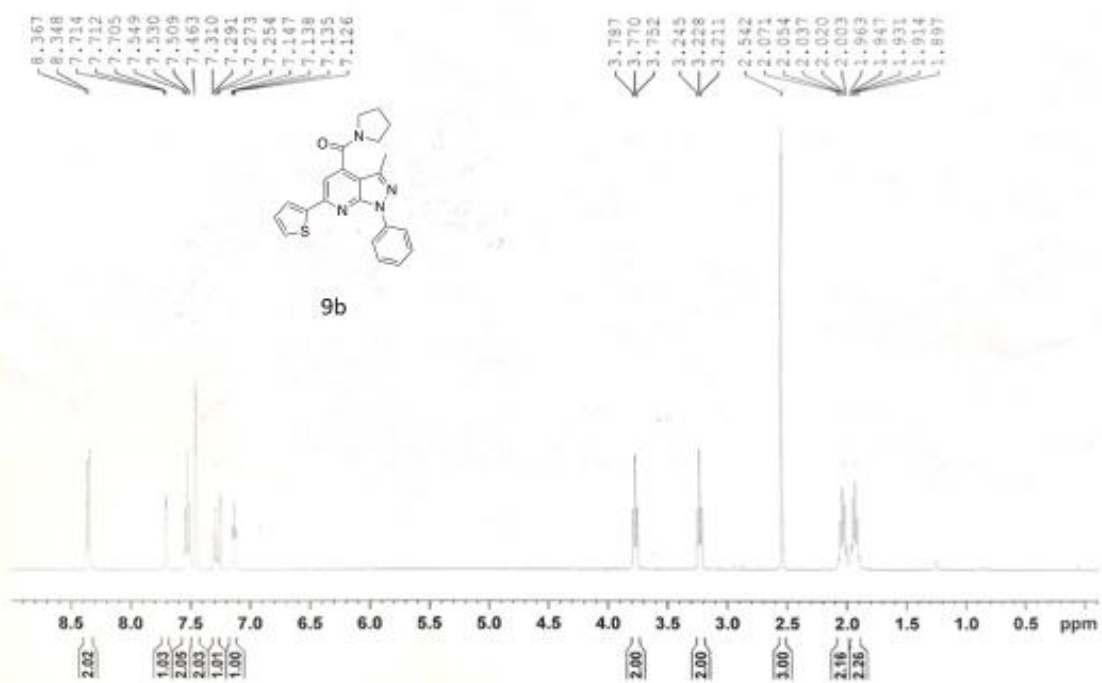

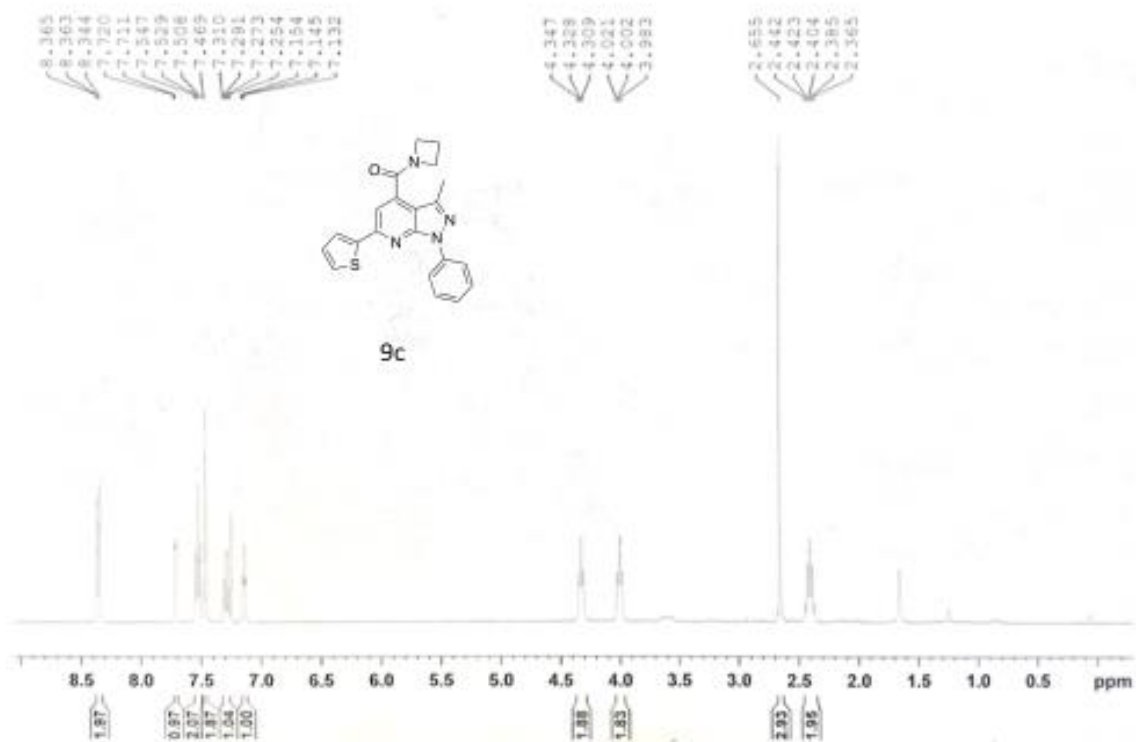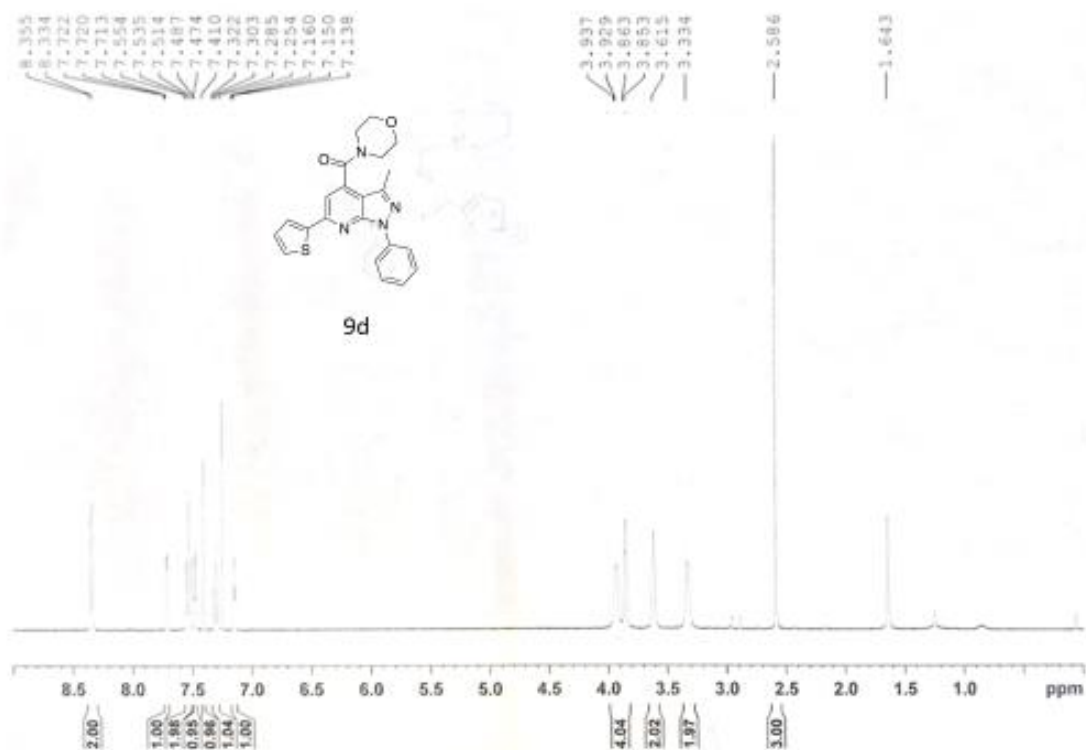

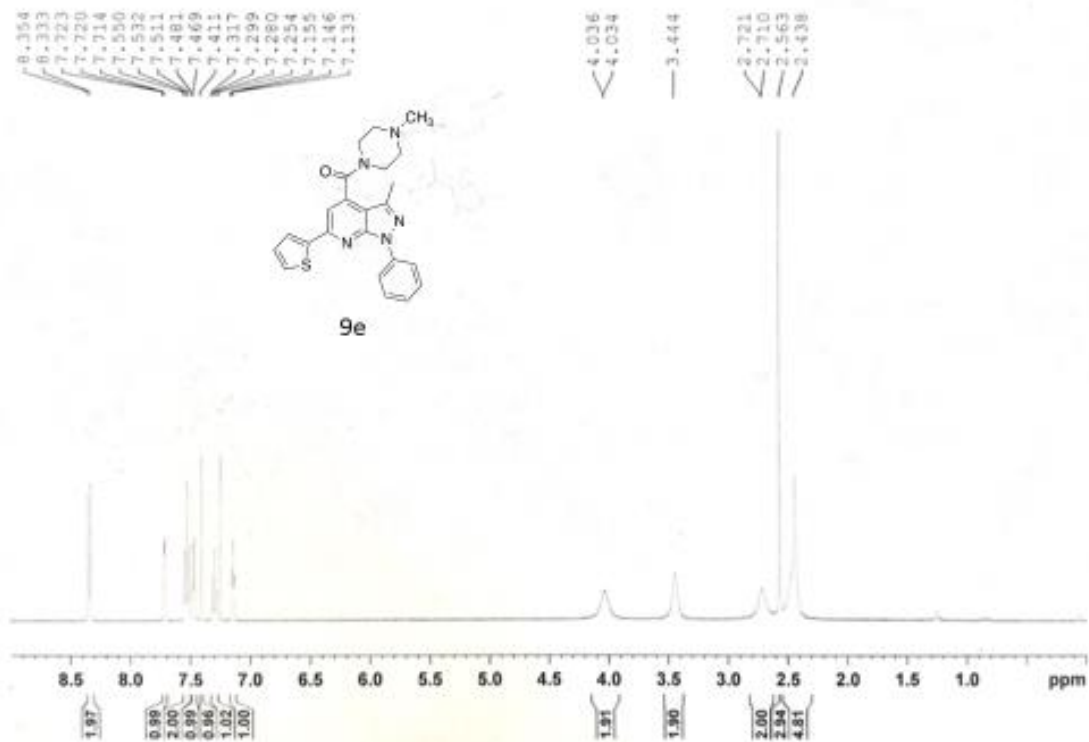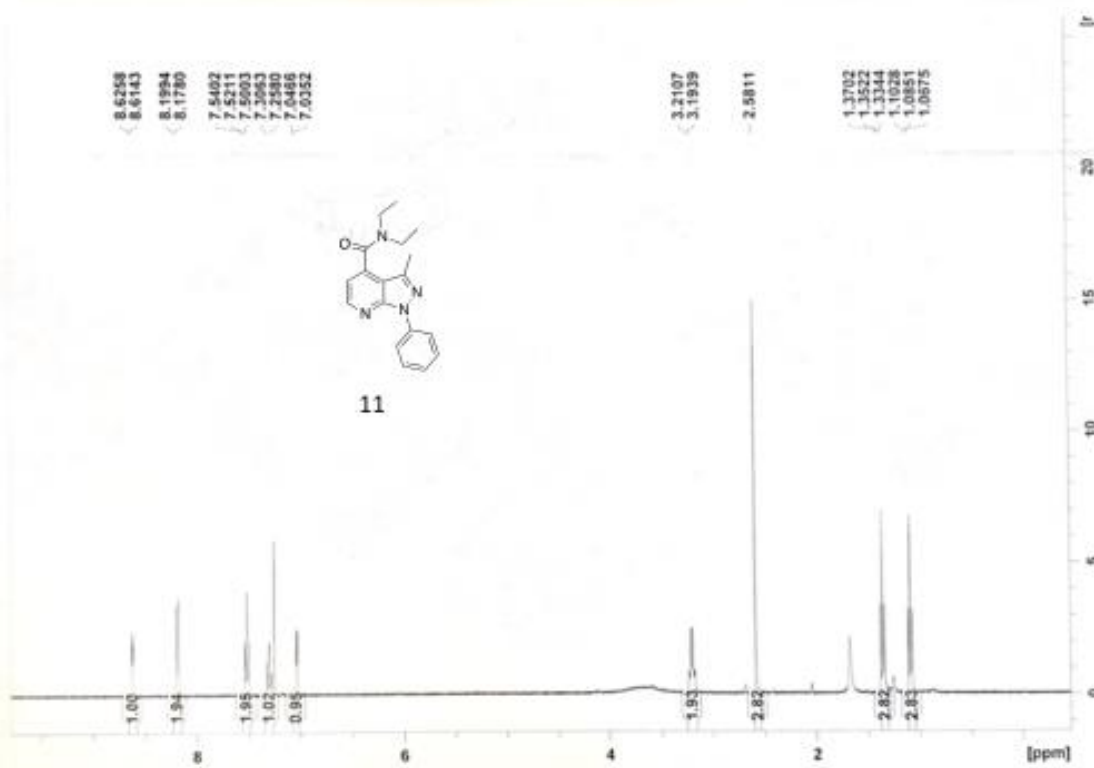

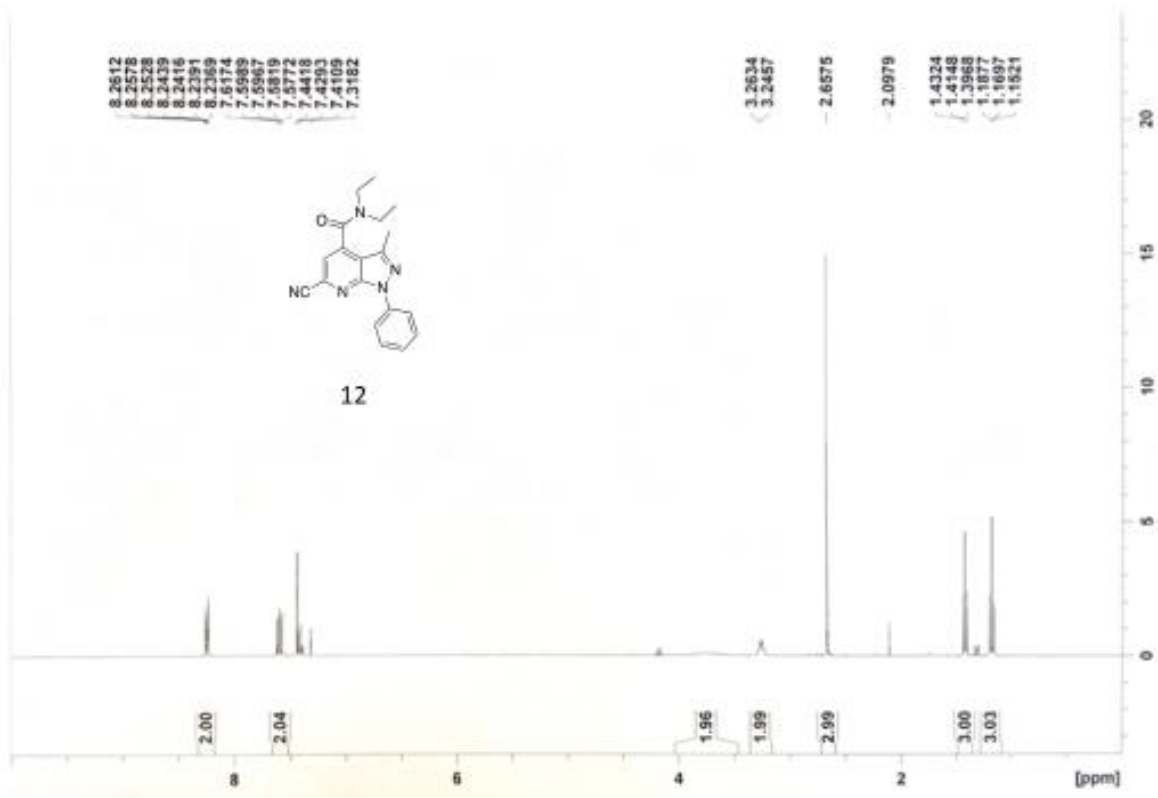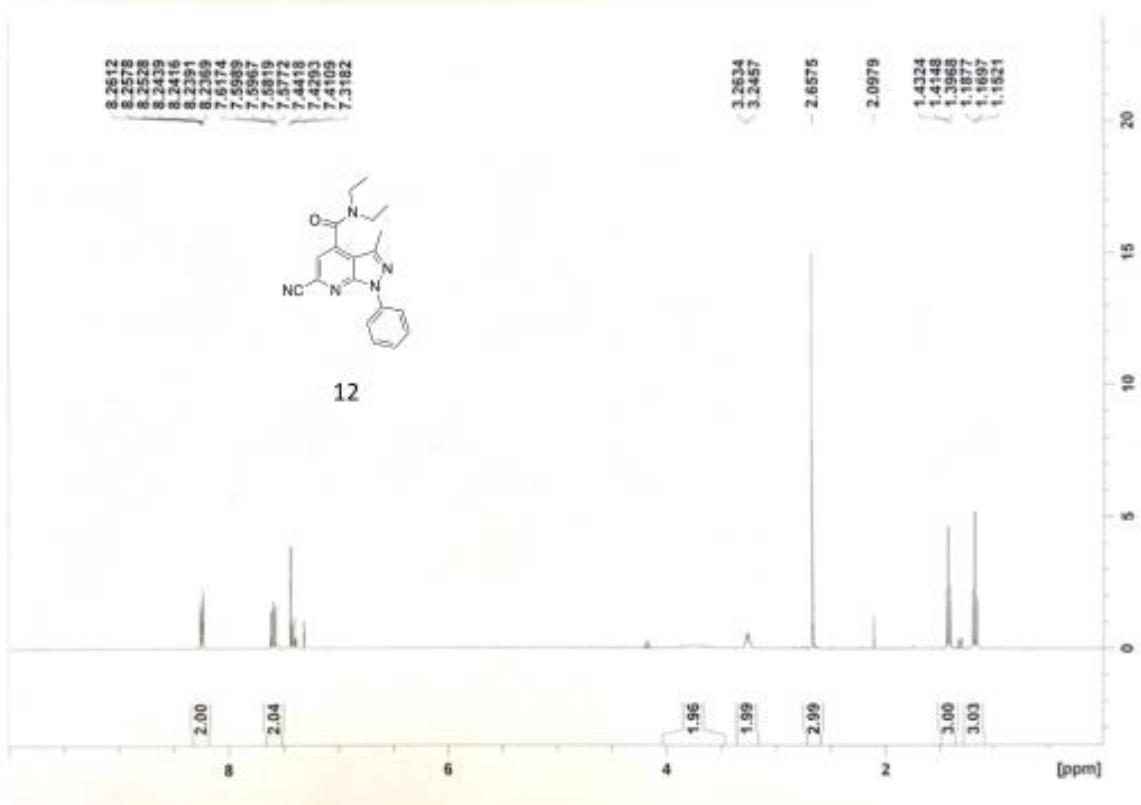

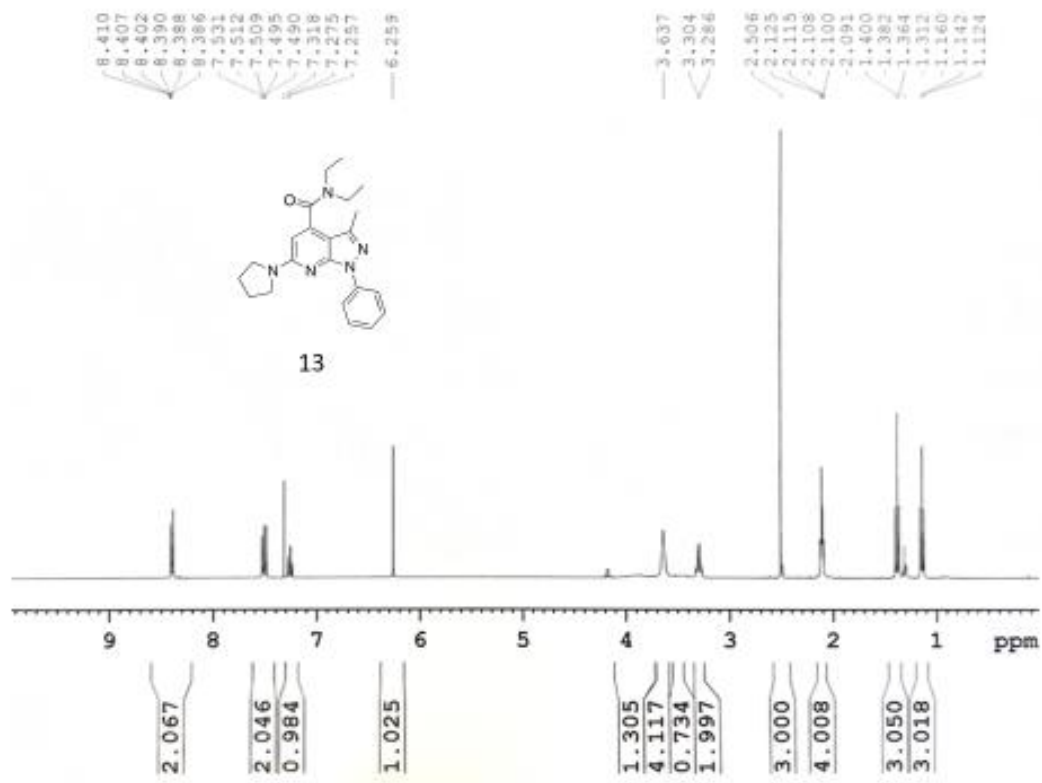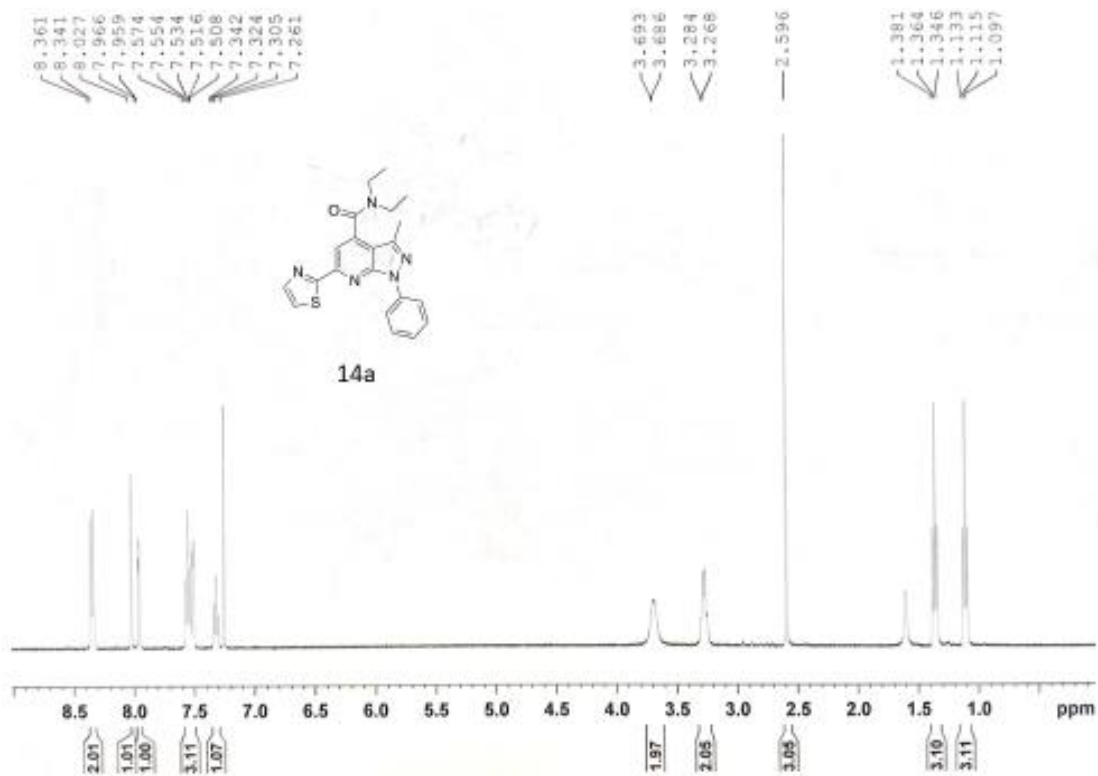

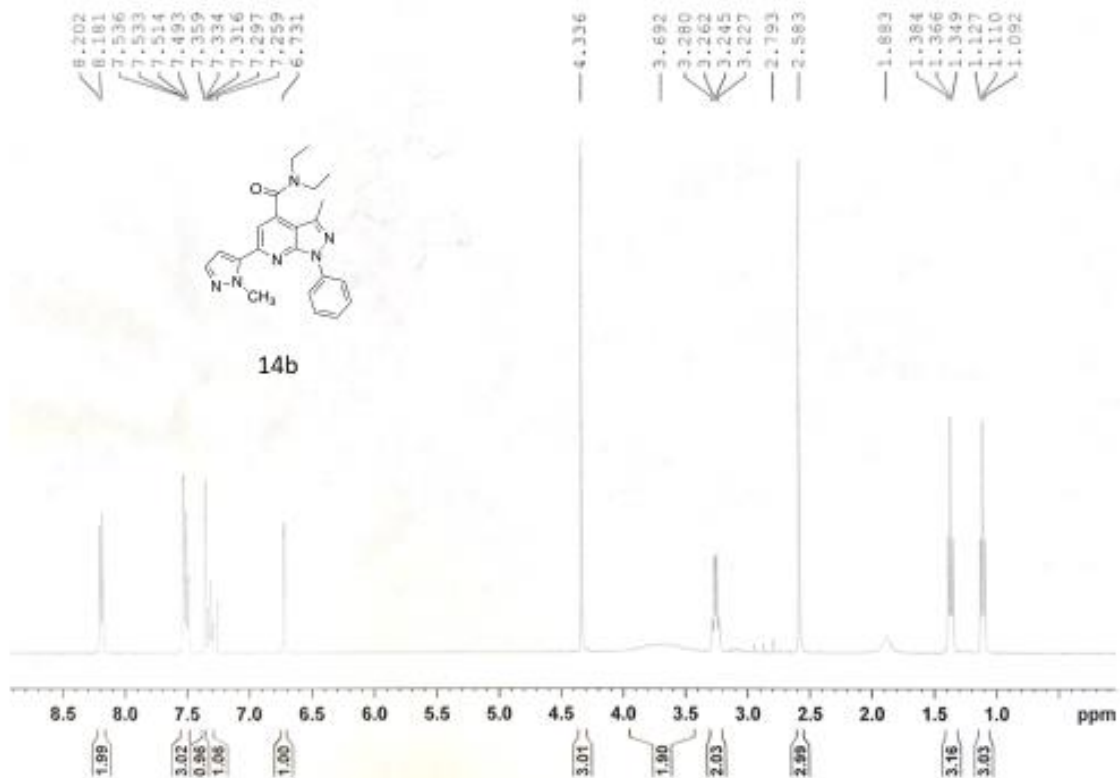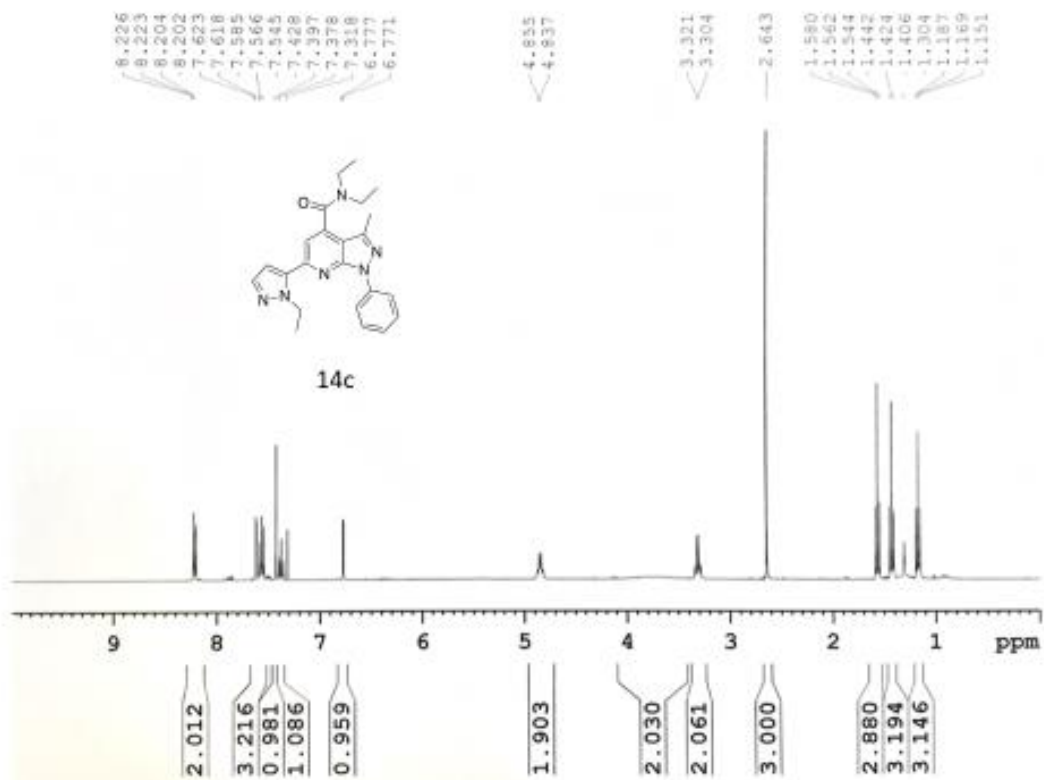

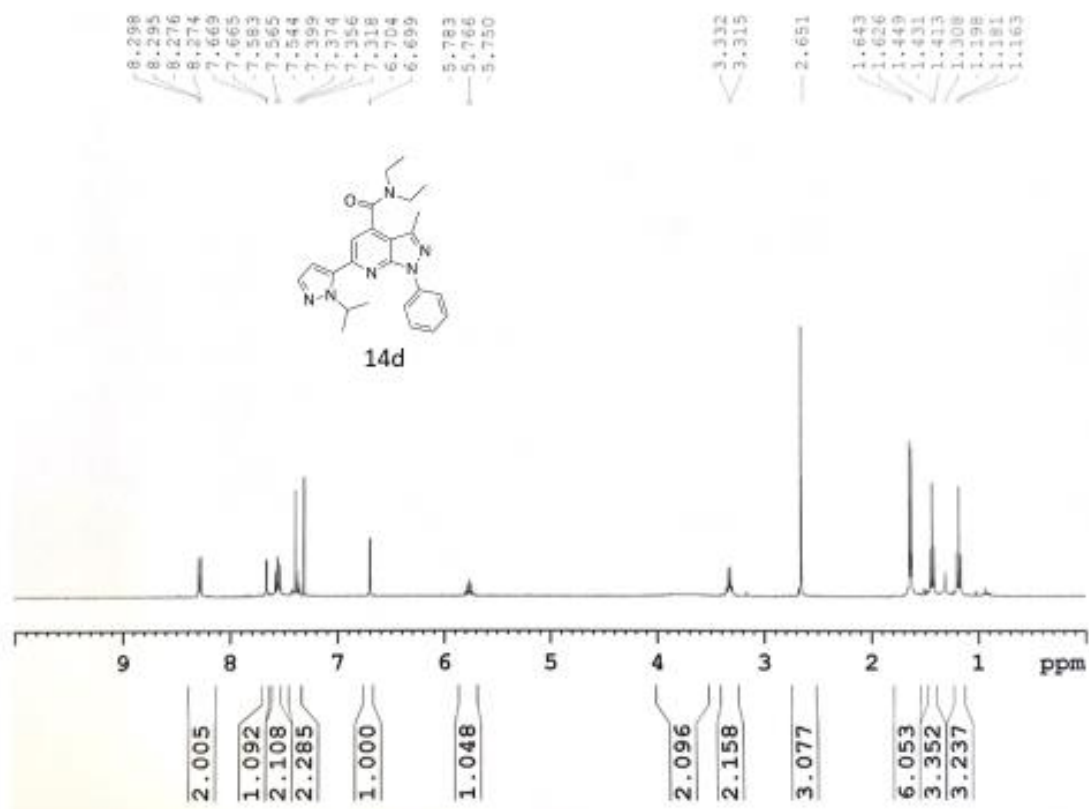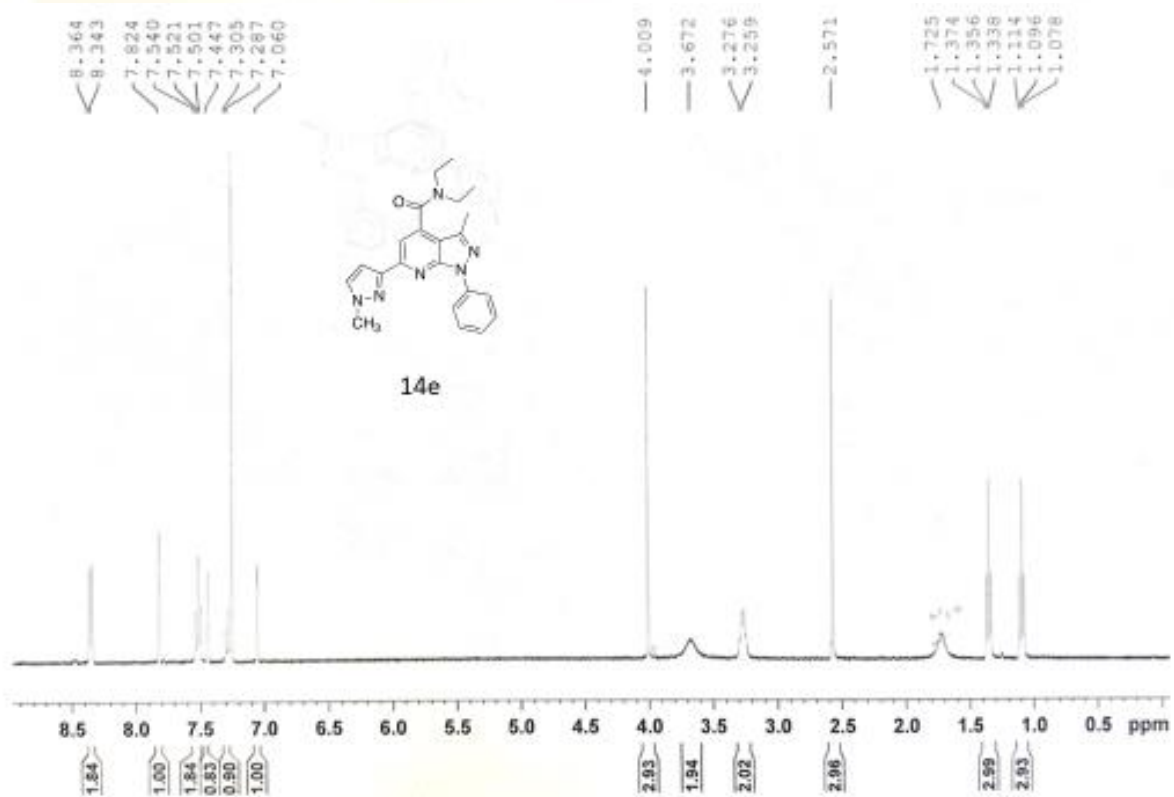



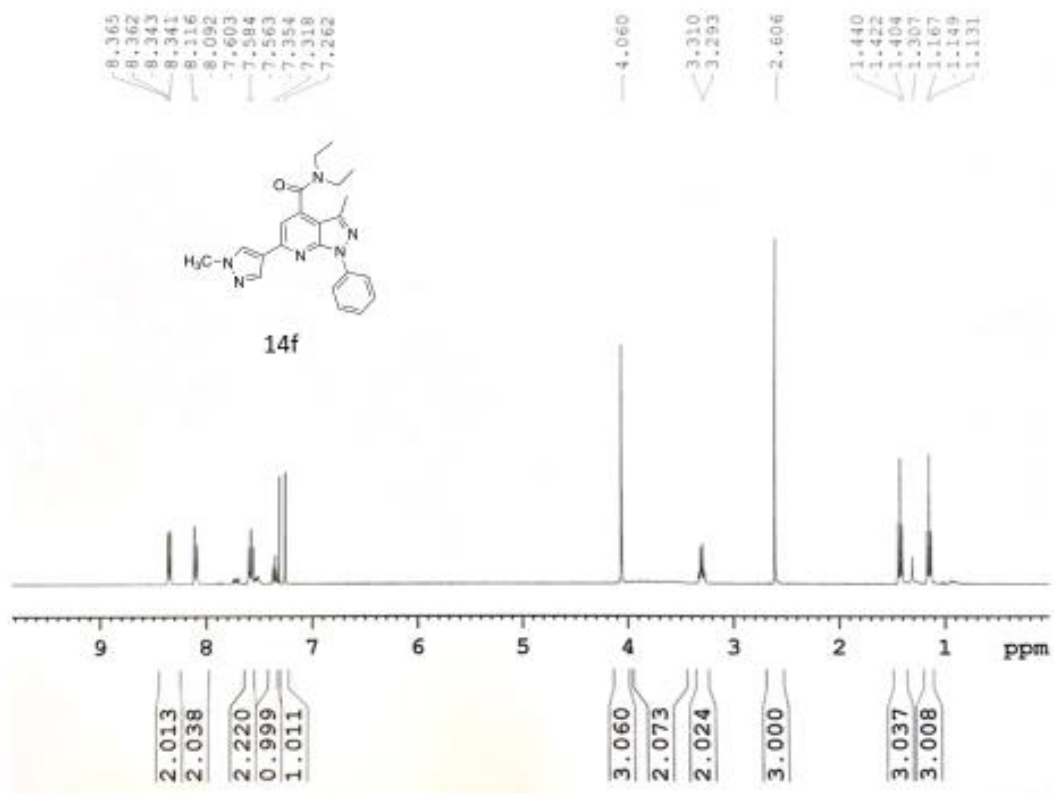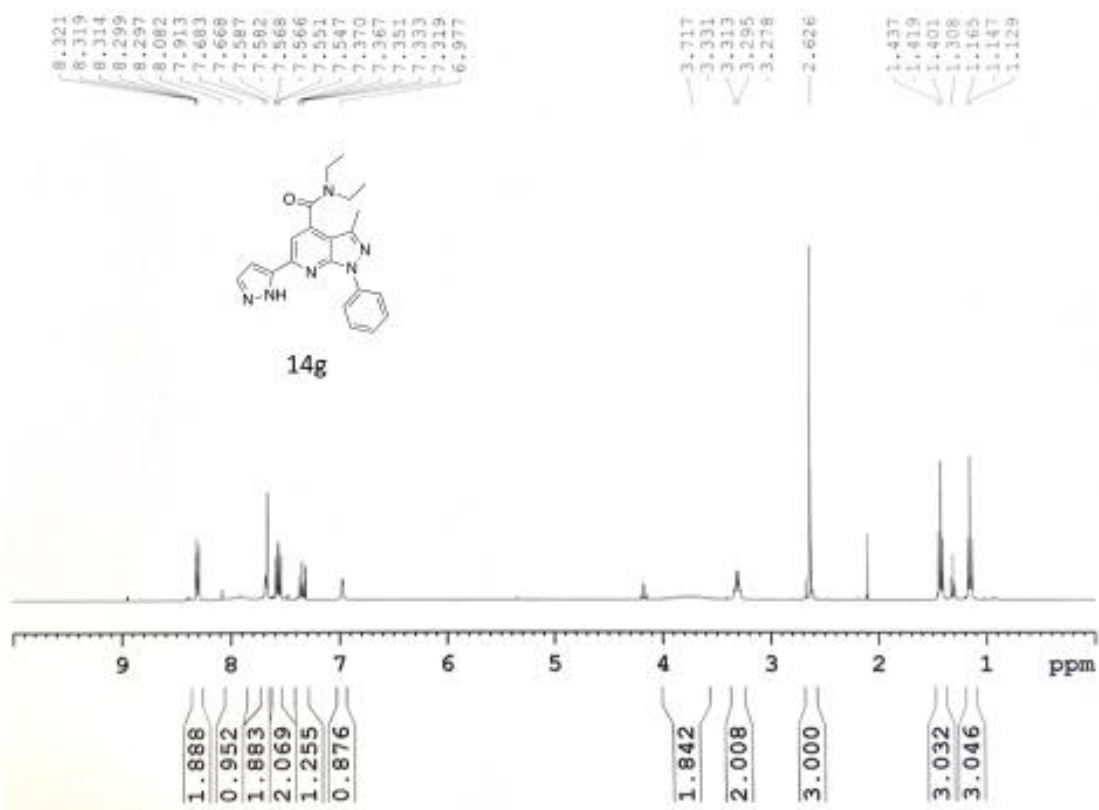

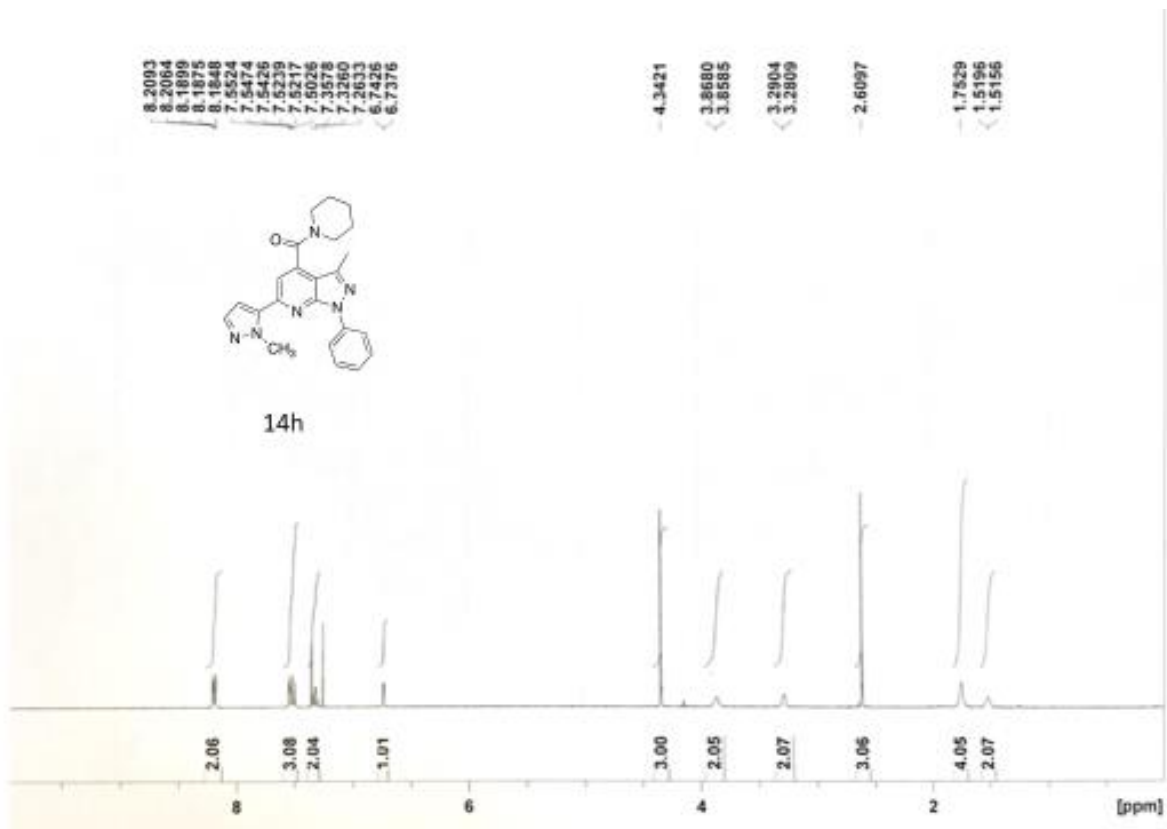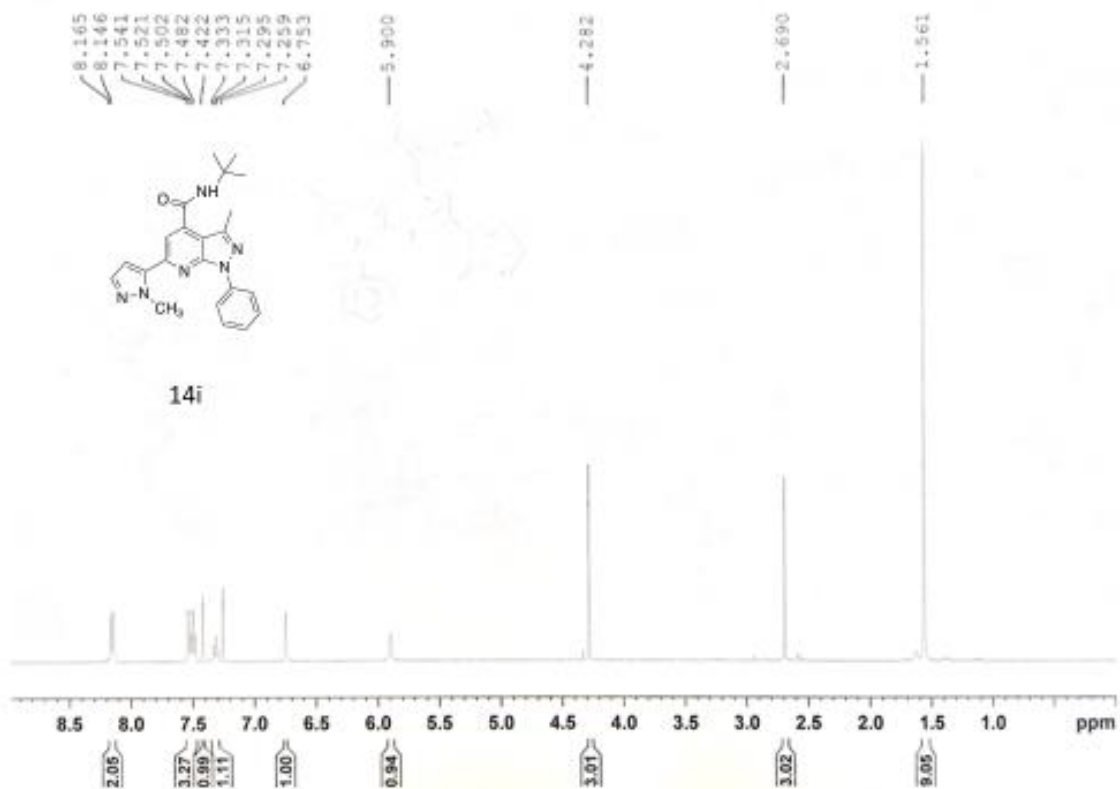

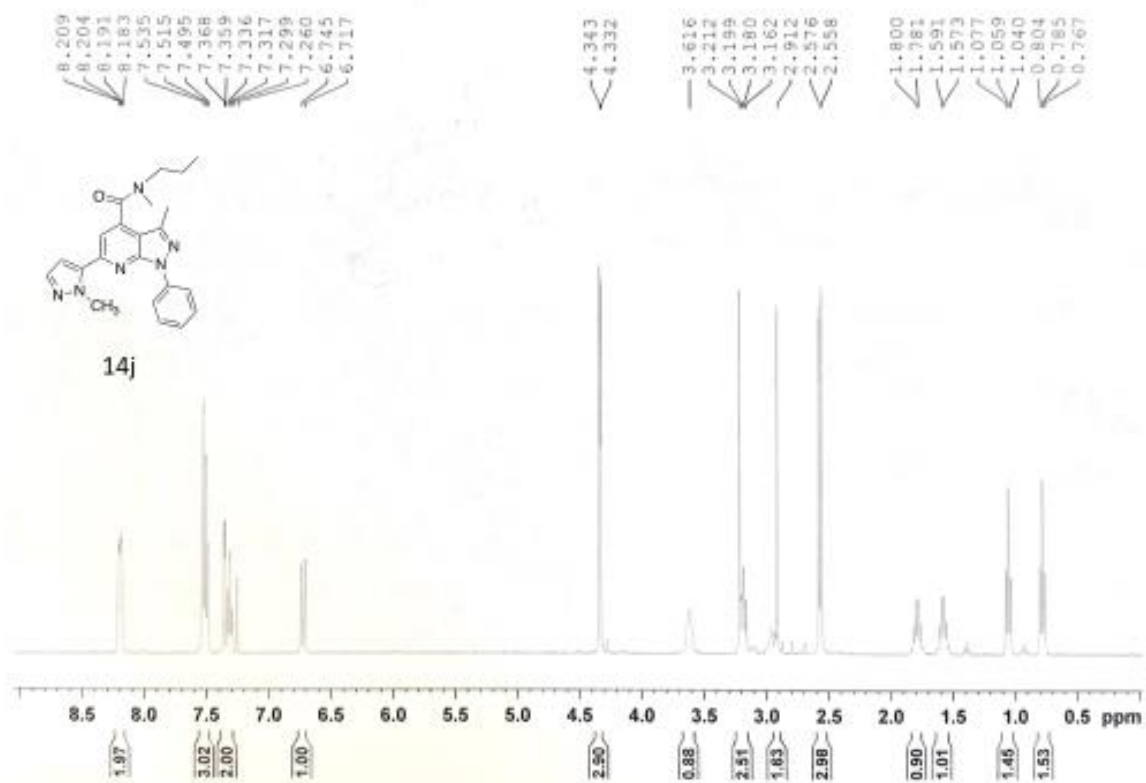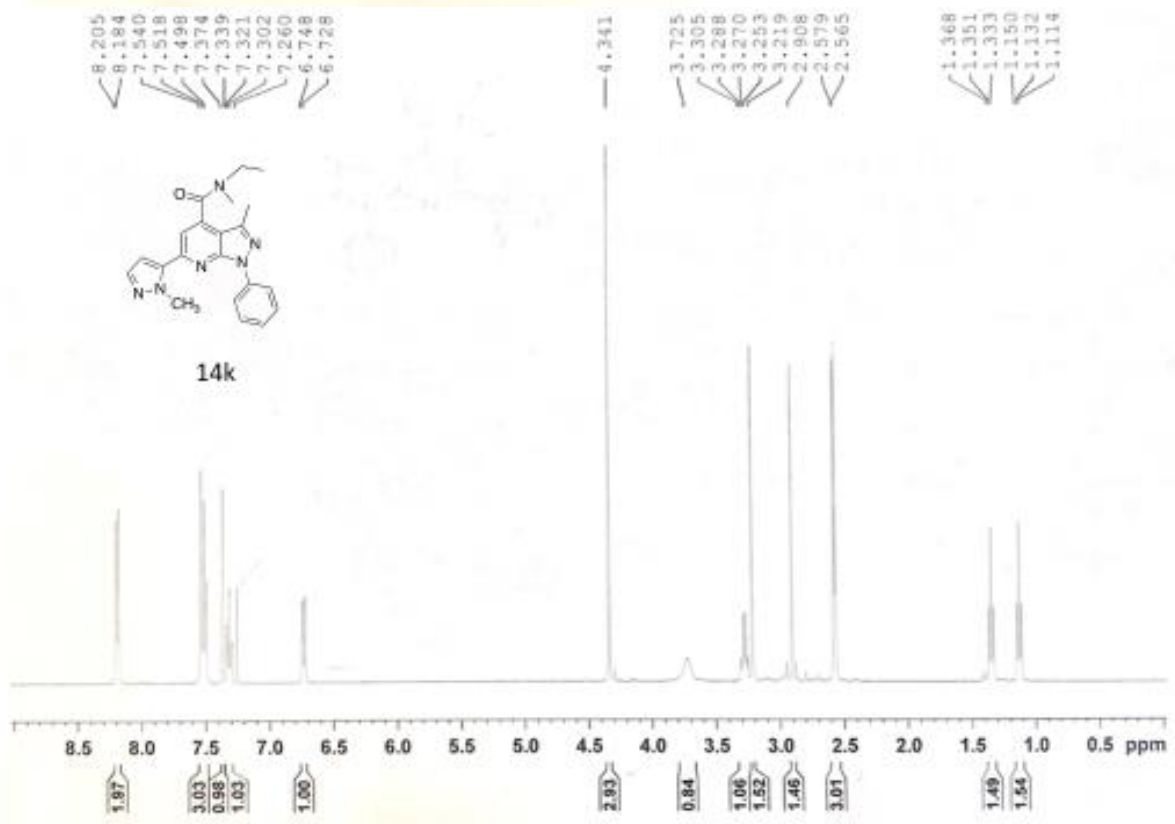

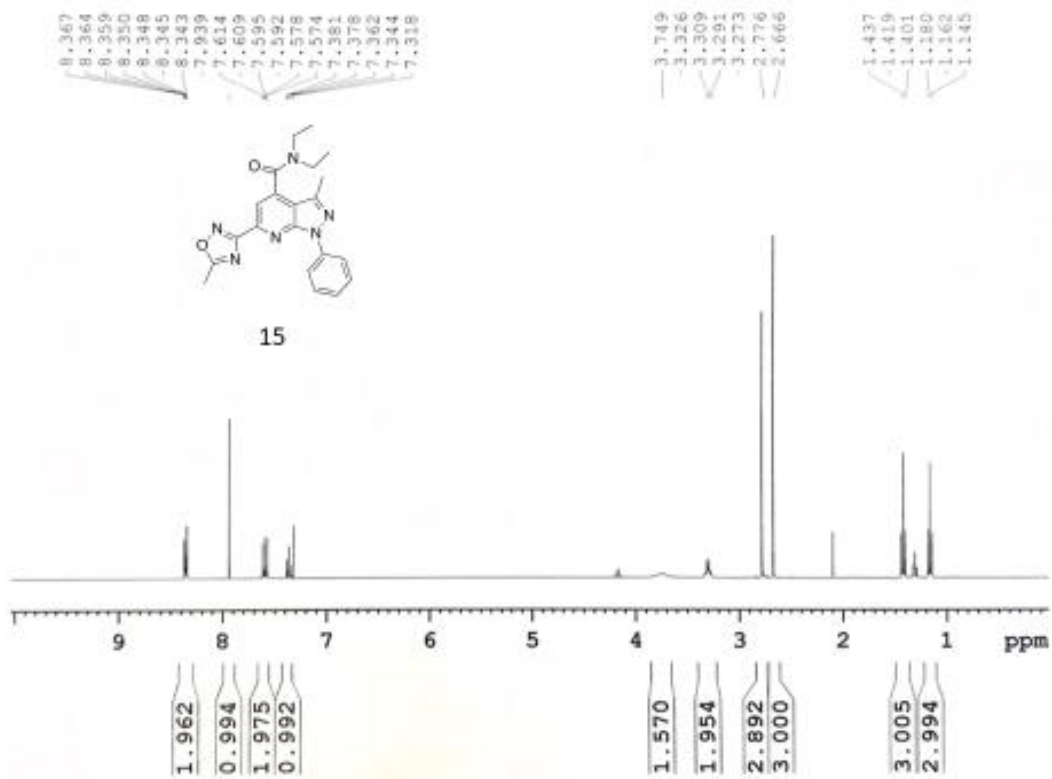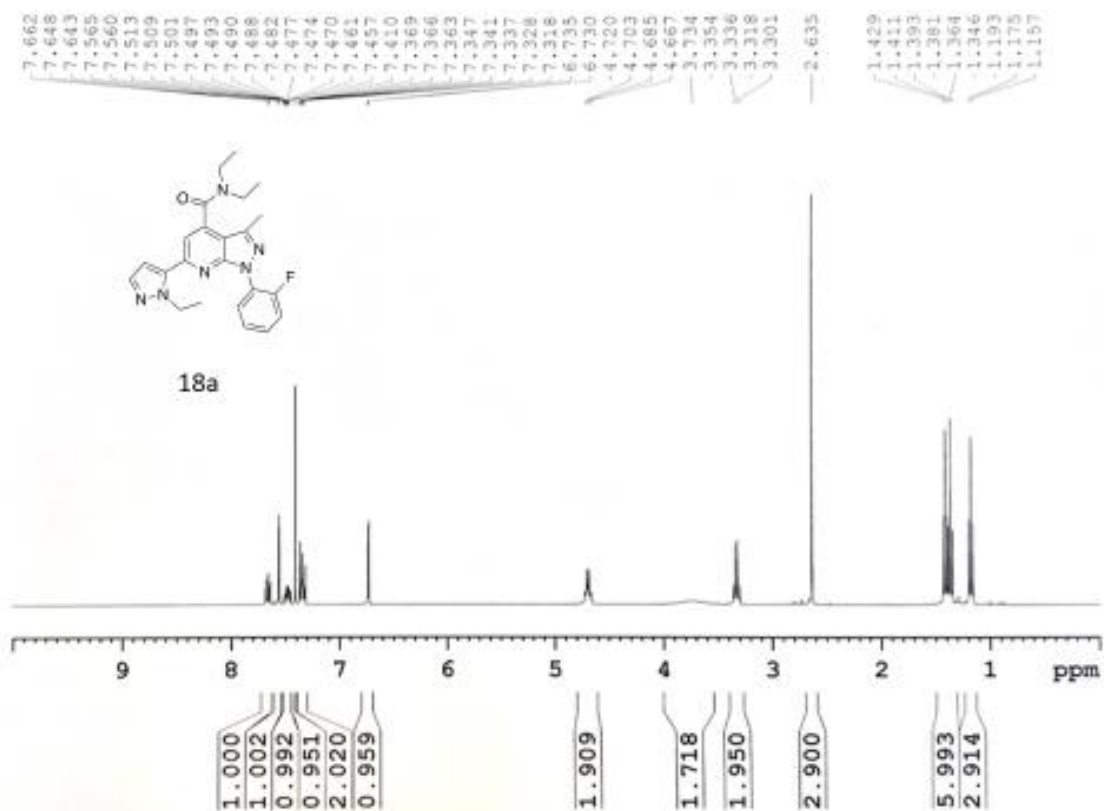

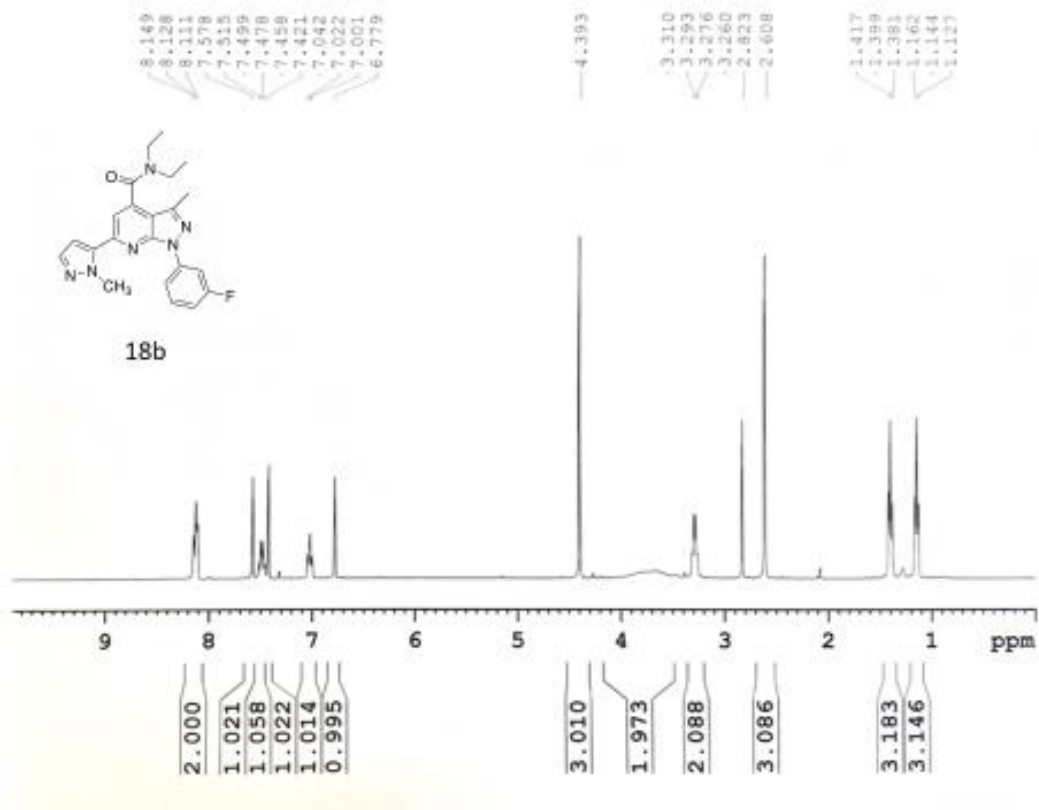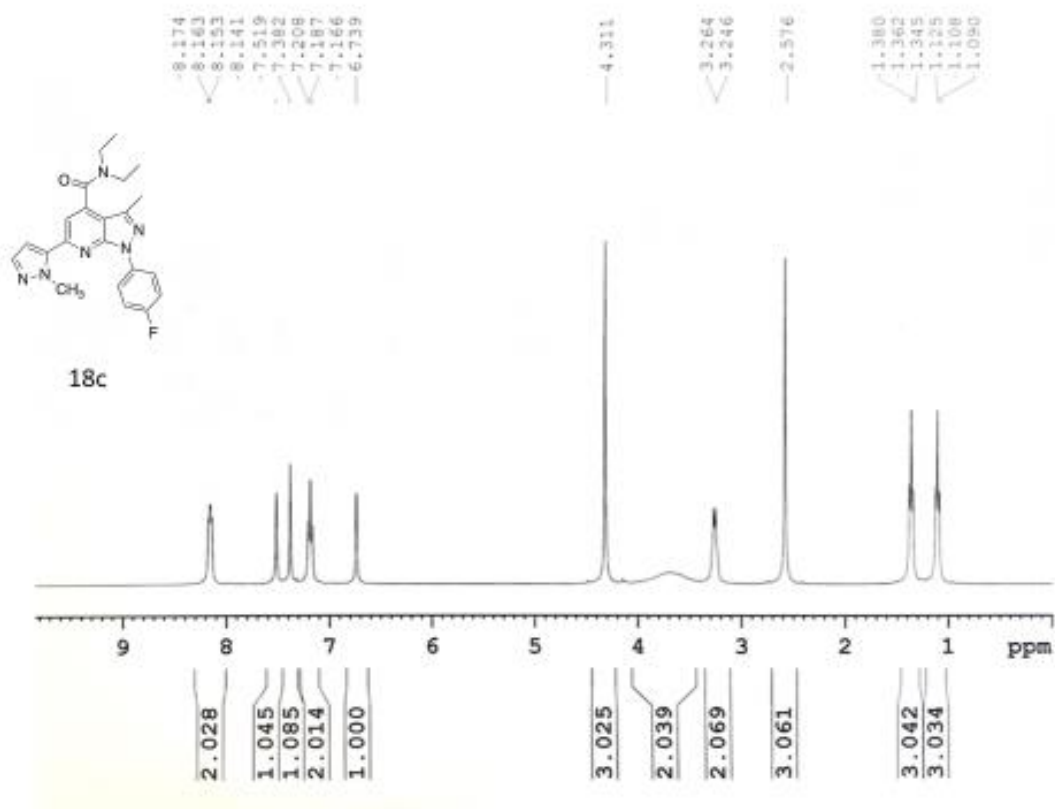

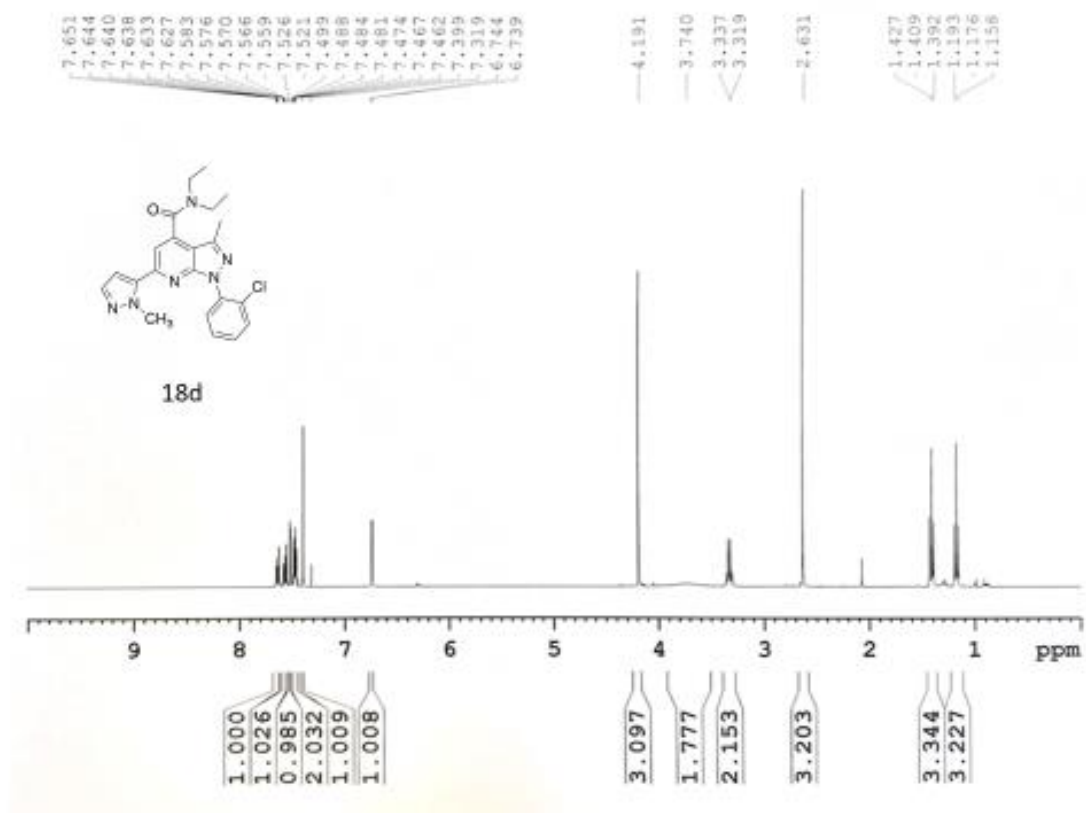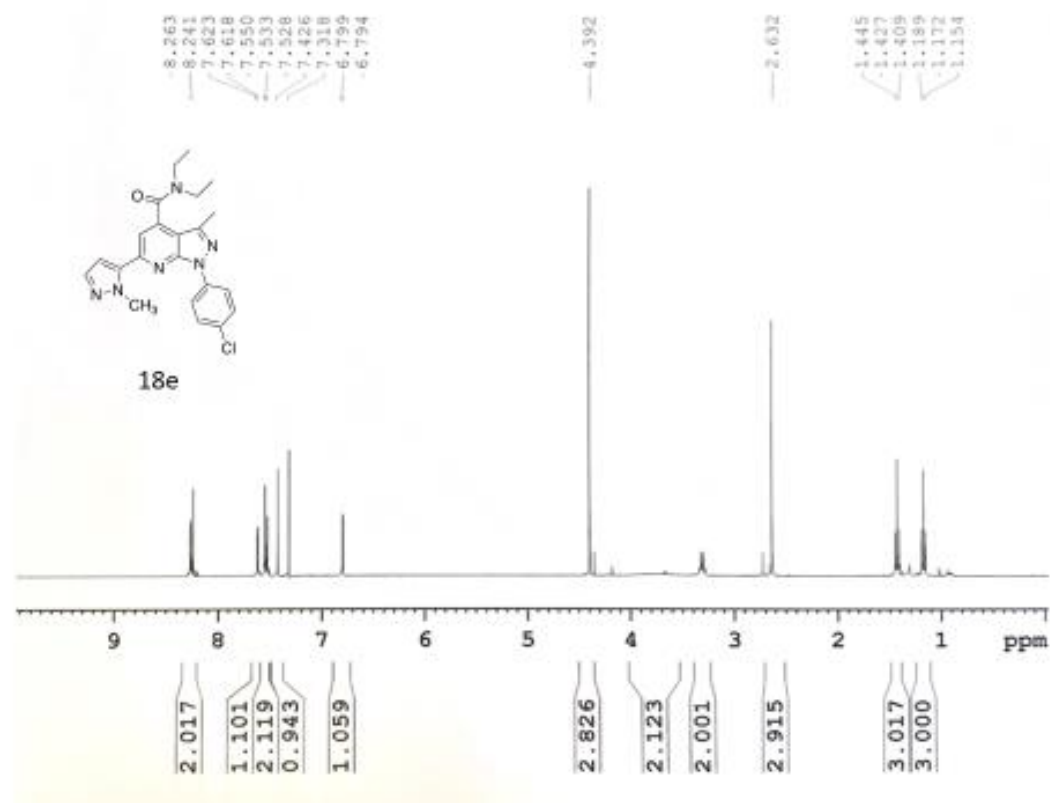

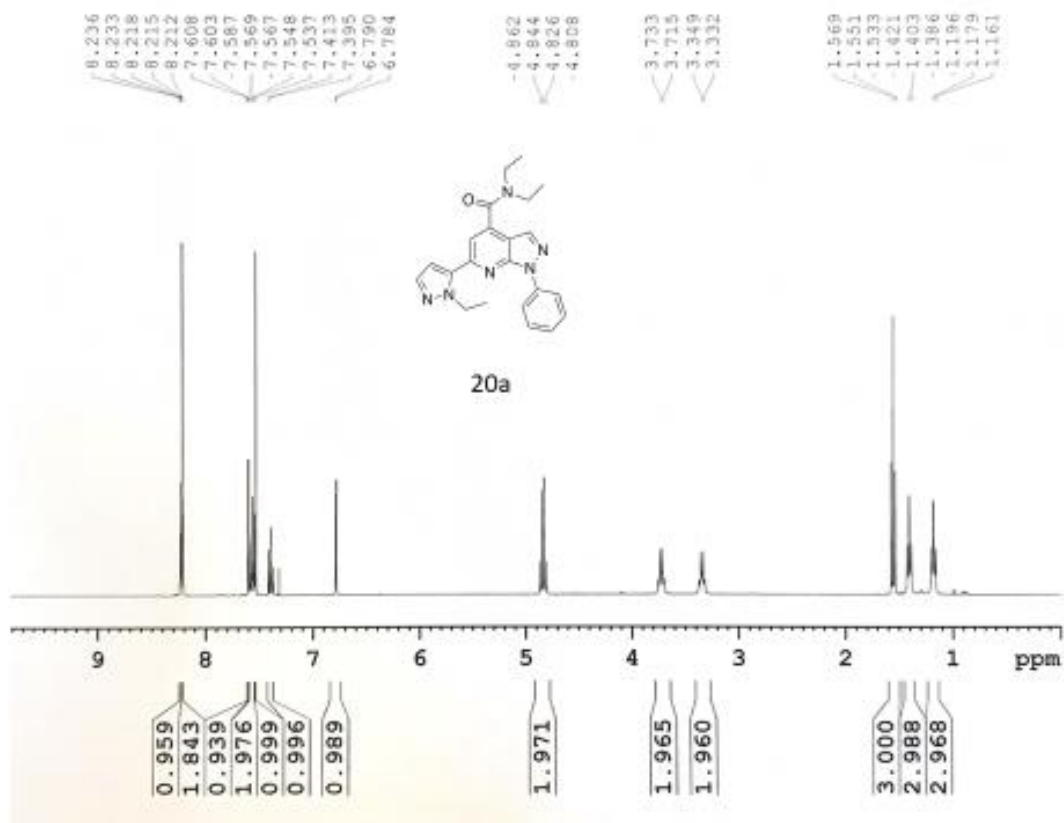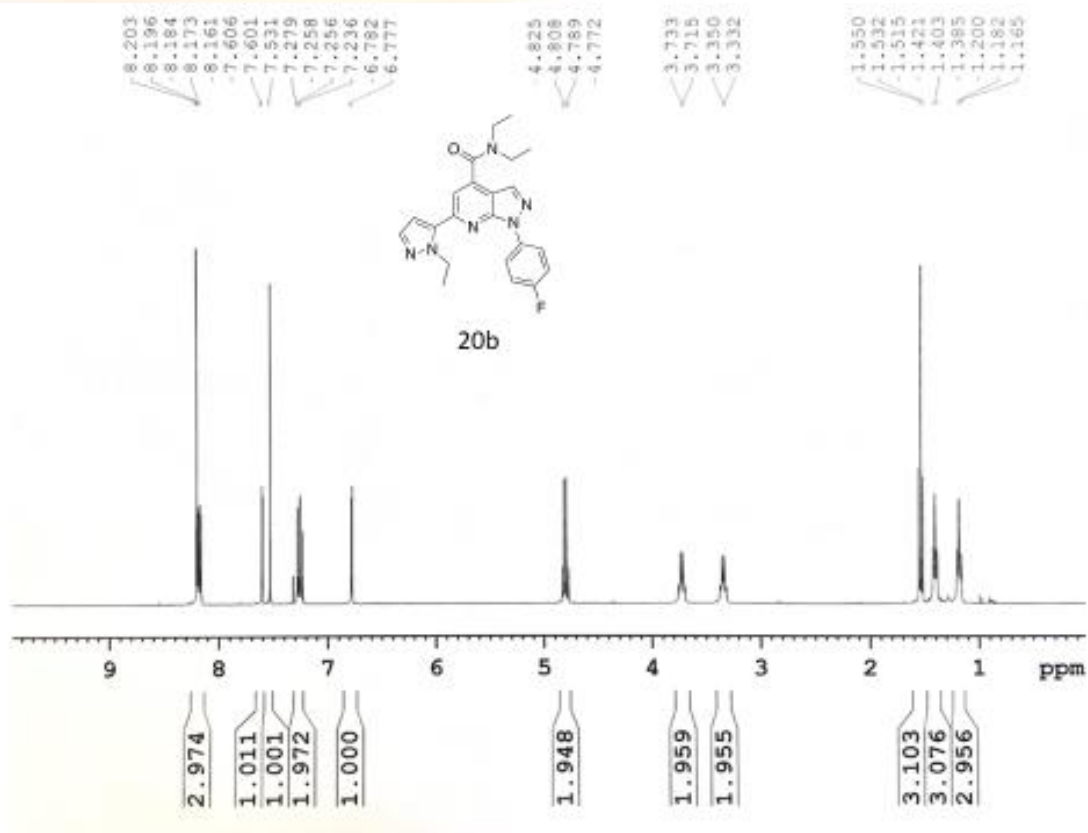

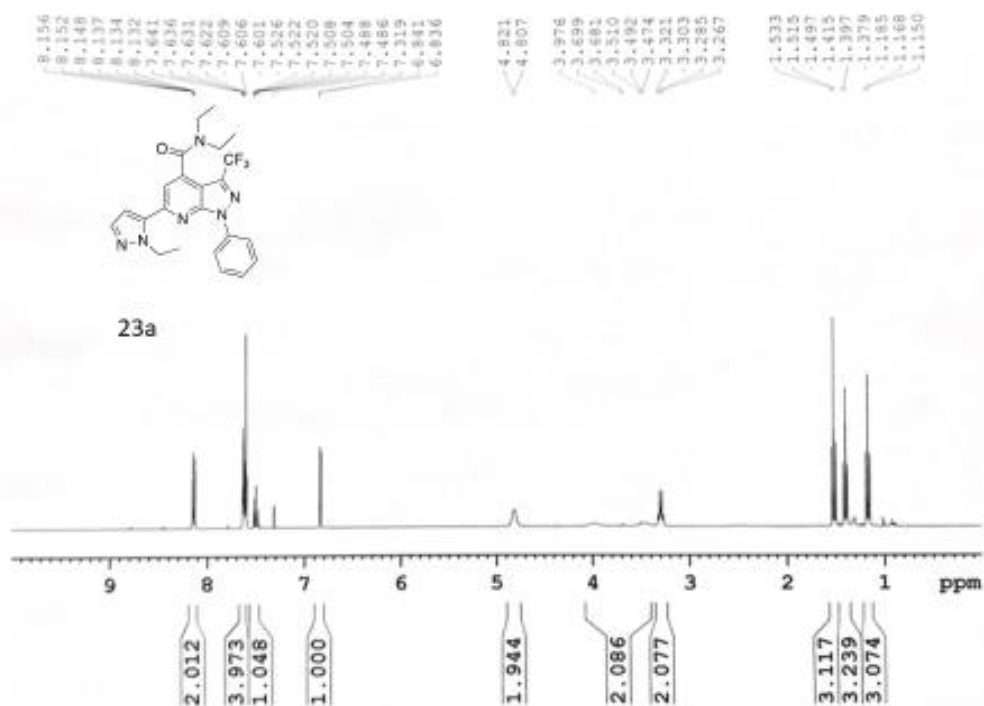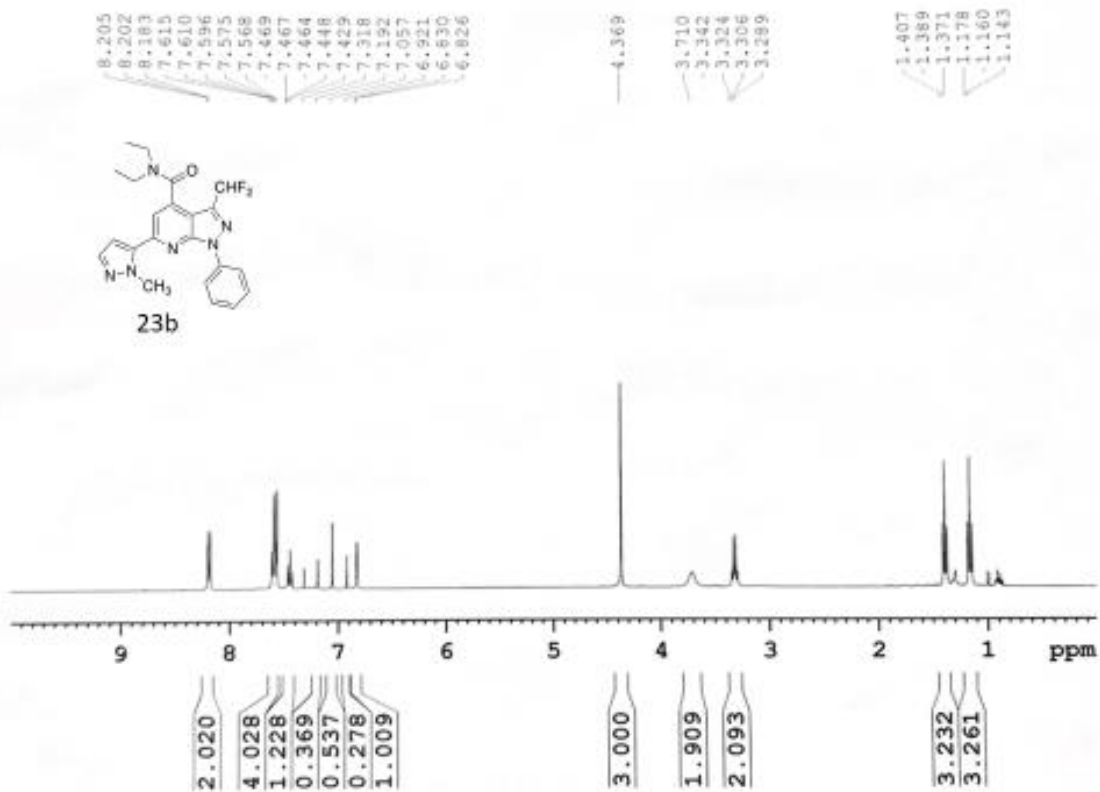



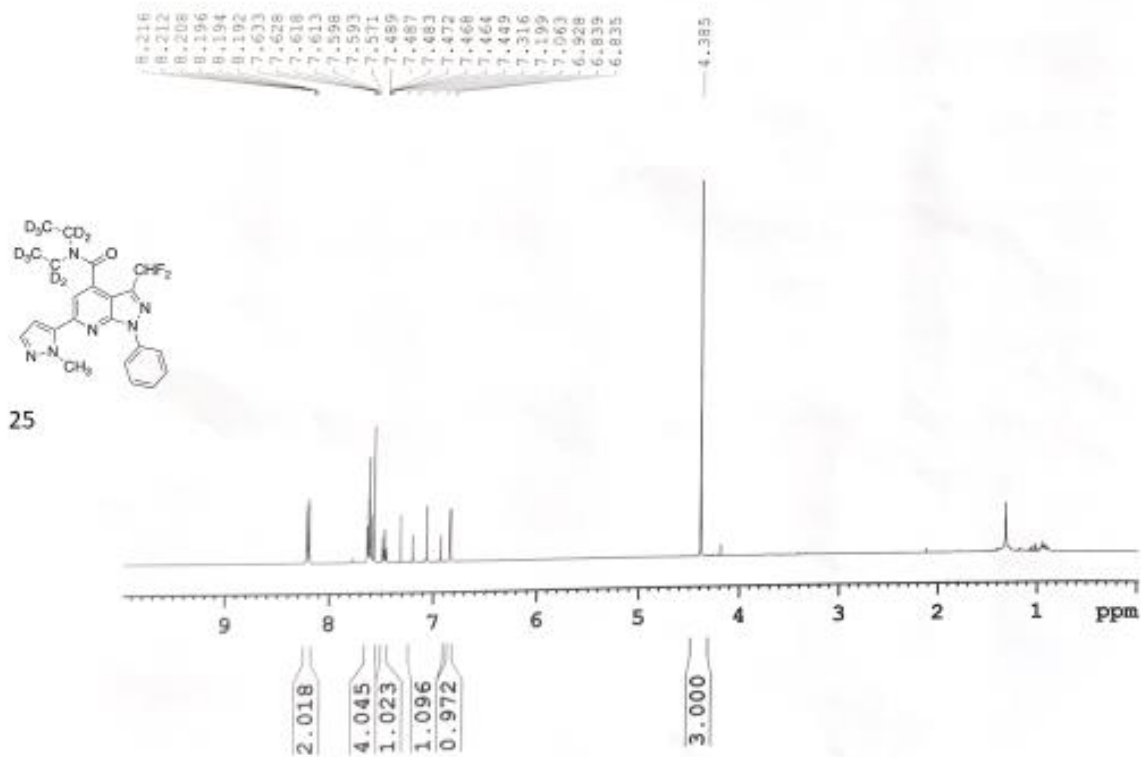

## miniLC

Method: 6 MINUTE ISOCRATIC 80% acf  
 Batch: MLO  
 Sample: MSU-MIG-1-122  
 User: Administrator  
 SN: 0115000000  
 Date: 11/16/2022 4:23 AM

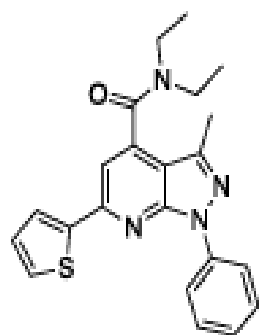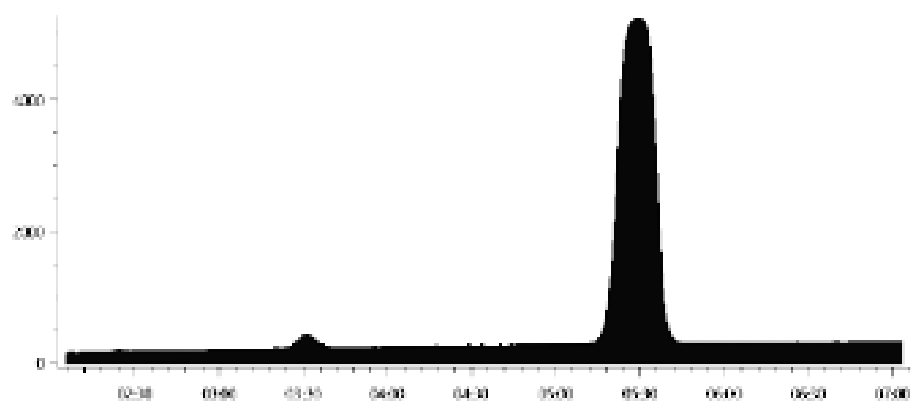

| # | Compound | Retention Time | Area    | % Area | Height  |
|---|----------|----------------|---------|--------|---------|
| 1 |          | 01:31.0        | 1320.8  | 1.8    | 189.14  |
| 2 |          | 05:29.5        | 72168.3 | 98.2   | 4937.01 |

## miniLC

Method: 6 MINUTE ISOCRA TIC 80% acn  
 Hatch: HN  
 Sample: MSU-MLC-1-131  
 User: Administrator  
 S/N: 0118000000  
 Date: 11/16/2012 5:42 AM

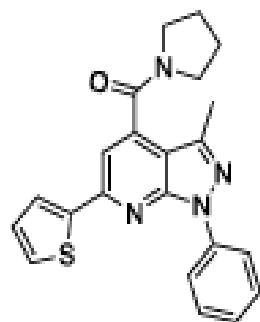

9b

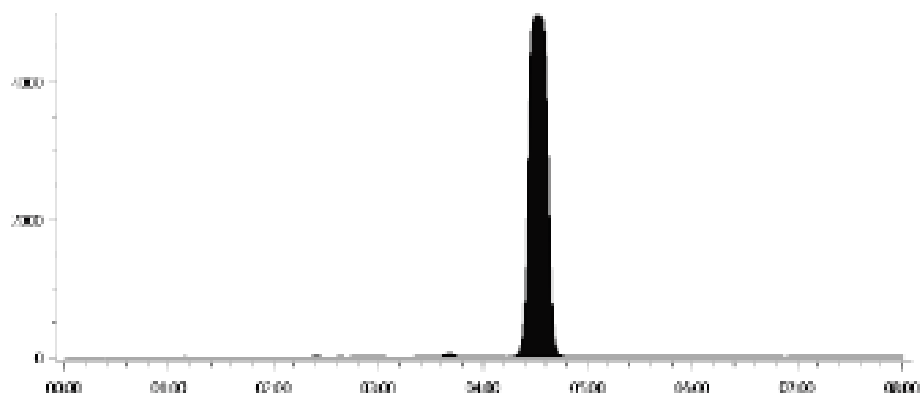

| # | Compound | Retention Time | Area    | % Area | Height  |
|---|----------|----------------|---------|--------|---------|
| 1 |          | 04:31.5        | 63515.5 | 100.0  | 4596.93 |

## miniLC

Method: 6 MINUTE ISOCRA TIC 80% acn  
 Hatch: LK  
 Sample: MSU-MLC-1-132  
 User: Guest  
 S/N: 0118000000  
 Date: 11/30/2012 4:39 AM

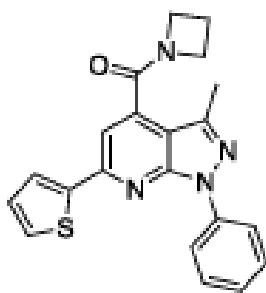

9c

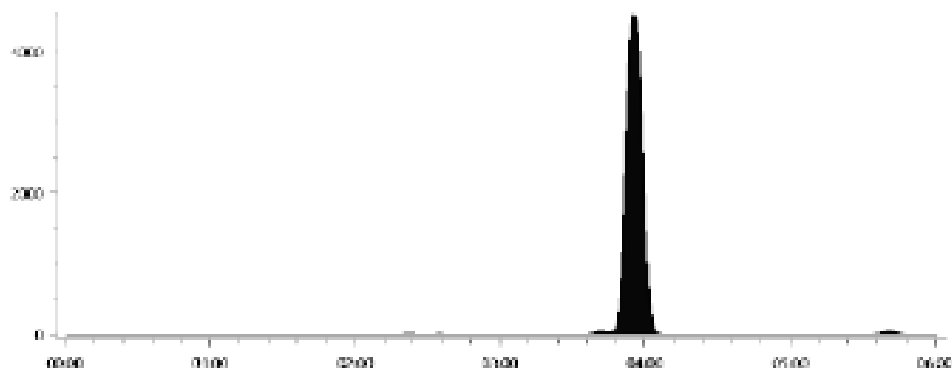

| # | Compound | Retention Time | Area    | % Area | Height  |
|---|----------|----------------|---------|--------|---------|
| 1 |          | 04:55.5        | 37985.3 | 98.6   | 4519.82 |
| 2 |          | 05:41.0        | 492.1   | 1.4    | 61.12   |

# miniLC

Method: 6 MINUTE ISOCRATIC 80% acn  
Batch: MLG  
Sample: MSU-MLG-1-133  
User: Administrator  
SN: 0118000000  
Date: 11/16/2022 4:51 AM

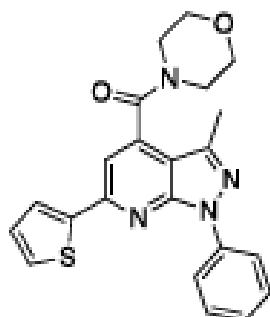

9d

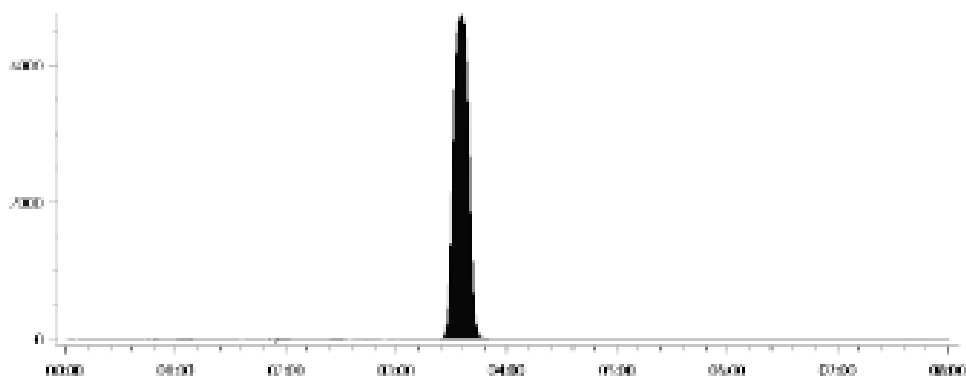

| # | Compound | Retention Time | Area    | % Area | Height  |
|---|----------|----------------|---------|--------|---------|
| 1 |          | 03:35.5        | 45196.0 | 100.0  | 4751.95 |

# miniLC

Method: 6 MINUTE ISOCRATIC 80% acn  
Batch: nnn  
Sample: MSU-MLG-1-136  
User: Administrator  
SN: 0118000000  
Date: 11/16/2022 3:59 AM

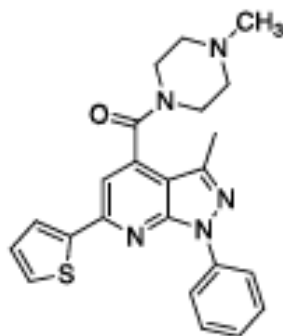

9e

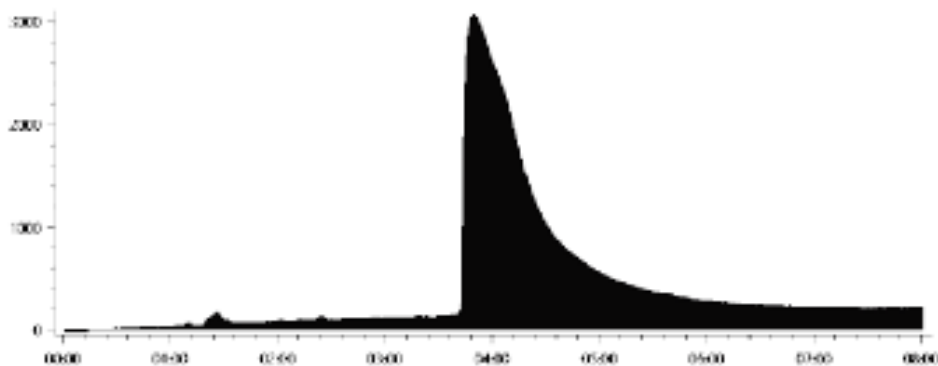

| # | Compound | Retention Time | Area     | % Area | Height  |
|---|----------|----------------|----------|--------|---------|
| 1 |          | 03:50.5        | 139138.0 | 100.0  | 2961.82 |

# miniLC

Method: 6 MINUTE ISOCRATIC 80% acn  
Batch: BNN  
Sample: MSU-MLC-1-121  
User: Administrator  
SN: 0115000000  
Date: 11/16/2022 5:32 AM

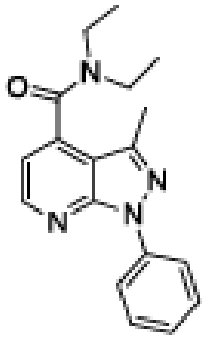

11

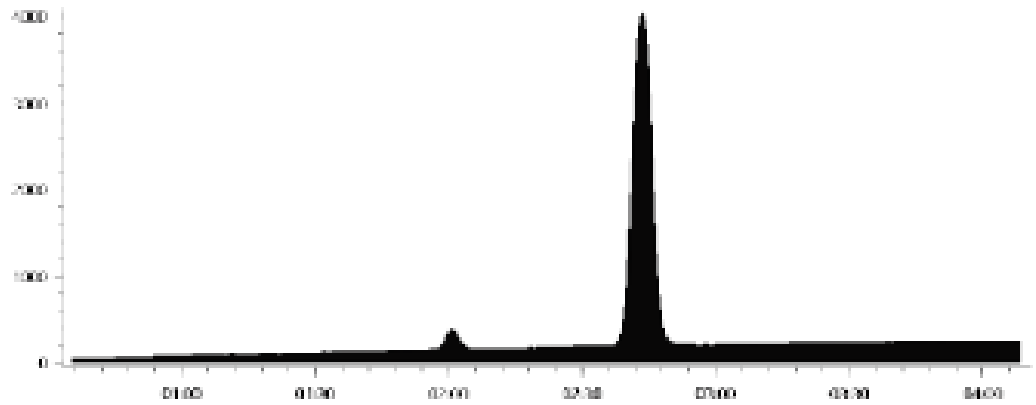

| # | Compound | Retention Time | Area    | % Area | Height  |
|---|----------|----------------|---------|--------|---------|
| 1 |          | 02:01.0        | 748.7   | 3.8    | 229.40  |
| 2 |          | 02:43.5        | 19088.3 | 96.2   | 3840.73 |

# miniLC

Method: 6 MINUTE ISOCRATIC 80% acn  
Batch: BNN  
Sample: MSU-TSR-1-32  
User: Guest  
SN: 0115000000  
Date: 11/30/2022 12:52 AM

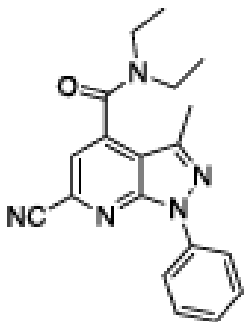

12

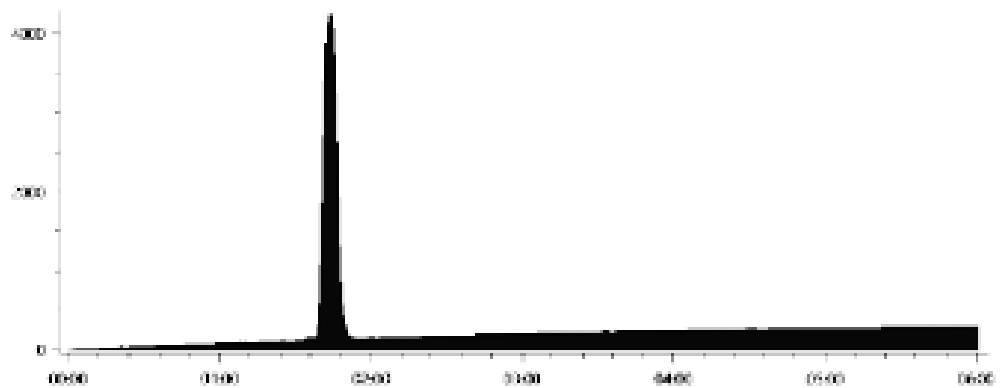

| # | Compound | Retention Time | Area    | % Area | Height  |
|---|----------|----------------|---------|--------|---------|
| 1 |          | 01:44.0        | 37329.5 | 100.0  | 4101.69 |

## miniLC

Method: 6 MINUTE ISOCRATIC 80% acn  
 Batch: 177  
 Sample: MSU-12H-142  
 User: Guest  
 S/N: 0118000000  
 Date: 11/30/2022 12:08 AM

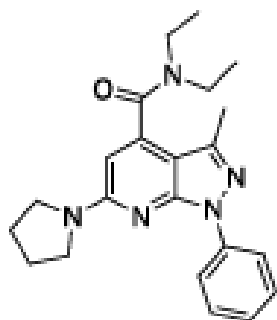

13

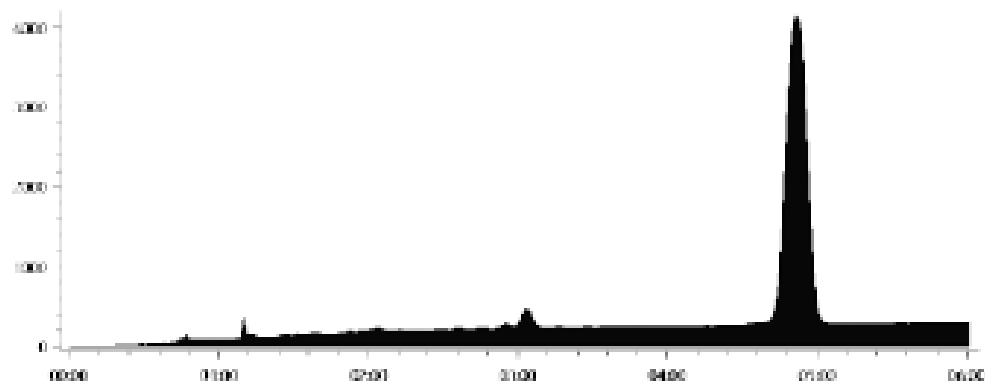

| # | Compound | Retention Time | Area    | % Area | Height  |
|---|----------|----------------|---------|--------|---------|
| 1 |          | 01:12.0        | 395.6   | 1.1    | 50.53   |
| 2 |          | 03:03.5        | 1016.7  | 2.7    | 231.62  |
| 3 |          | 04:52.0        | 35902.2 | 96.2   | 3874.36 |

## miniLC

Method: 6 MINUTE ISOCRATIC 80% acn  
 Batch: MU-G-SI-COND  
 Sample: MSU-MUG-1-169  
 User: Administrator  
 S/N: 0118000000  
 Date: 11/16/2022 11:59 PM

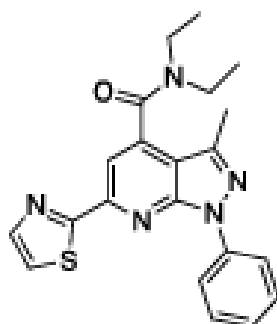

14a

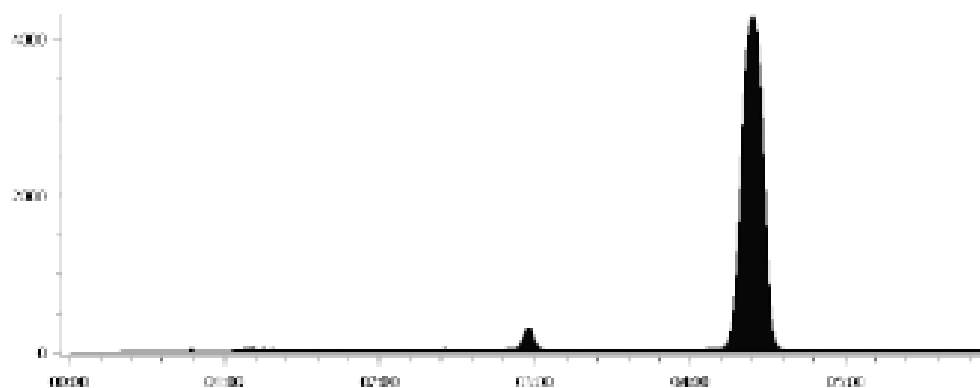

| # | Compound | Retention Time | Area    | % Area | Height  |
|---|----------|----------------|---------|--------|---------|
| 1 |          | 02:57.5        | 4367.1  | 3.3    | 285.64  |
| 2 |          | 04:24.0        | 99638.6 | 96.7   | 4243.10 |

# miniLC

Method: 6 MINUTE ISOCRATIC 80% acn  
 Batch: LK  
 Sample: MS11-MLC-1-185  
 Use: Control  
 SN: 0118000000  
 Date: 11/30/2012 4:47 AM

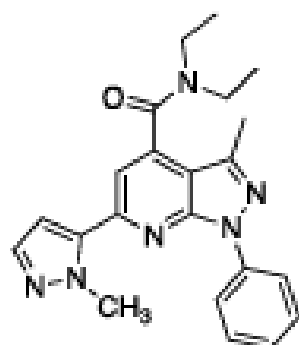

14b

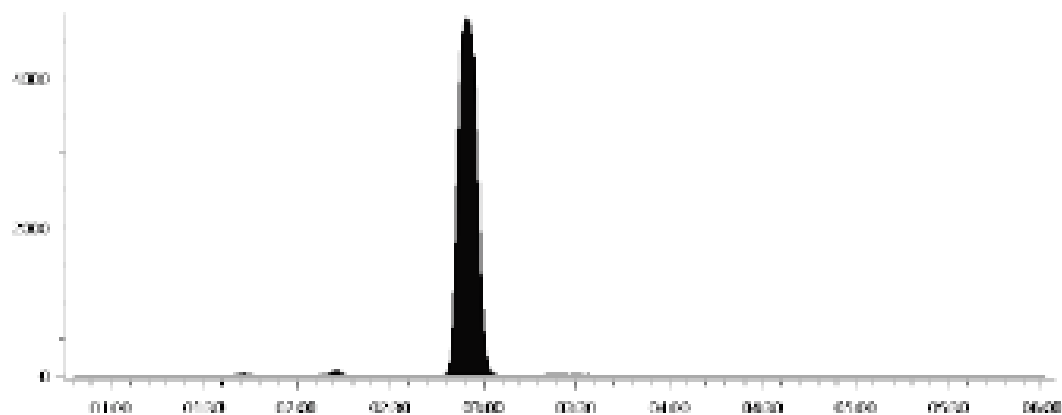

| # | Compound | Retention Time | Area    | % Area | Height  |
|---|----------|----------------|---------|--------|---------|
| 1 |          | 02:12.5        | 347.6   | 1.0    | 79.46   |
| 2 |          | 02:55.0        | 32596.9 | 99.0   | 4797.49 |

# miniLC

Method: 6 MINUTE ISOCRATIC 80% acn  
 Batch: LK  
 Sample: MS11-15H-1-57  
 Use: Control  
 SN: 0118000000  
 Date: 11/30/2012 4:24 AM

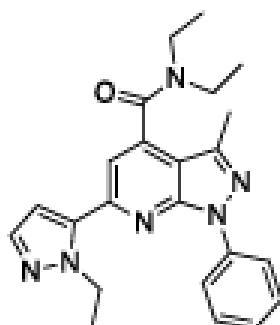

14c

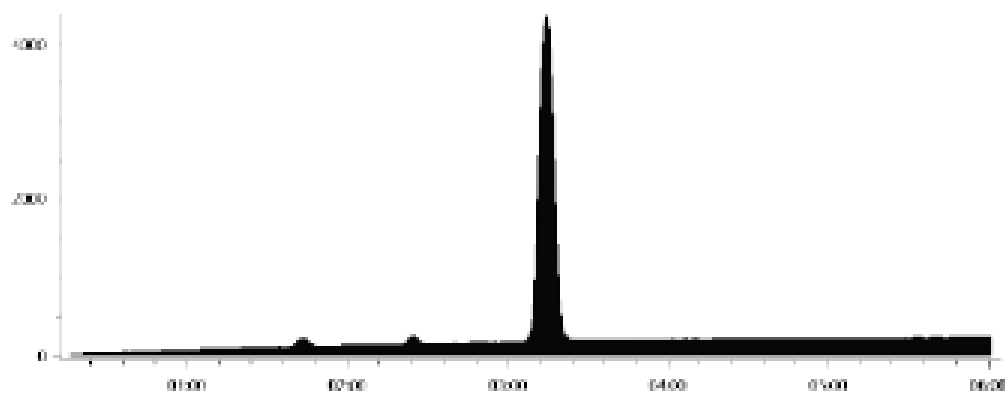

| # | Compound | Retention Time | Area    | % Area | Height  |
|---|----------|----------------|---------|--------|---------|
| 1 |          | 01:44.0        | 472.8   | 1.7    | 96.39   |
| 2 |          | 02:24.5        | 337.0   | 1.2    | 88.37   |
| 3 |          | 03:14.5        | 27391.2 | 97.0   | 4140.04 |

# miniLC

Method: 6 MINUTE ISOCRATIC 80% acn  
 Batch: KJ  
 Sample: MSU-TSR-1-54  
 User: Administrator  
 SN: 0118000000  
 Date: 11/20/2022 1:04 AM

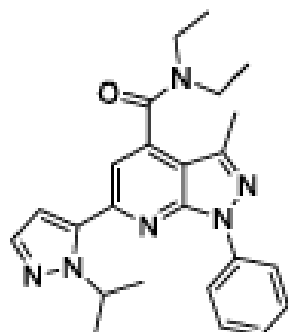

14d

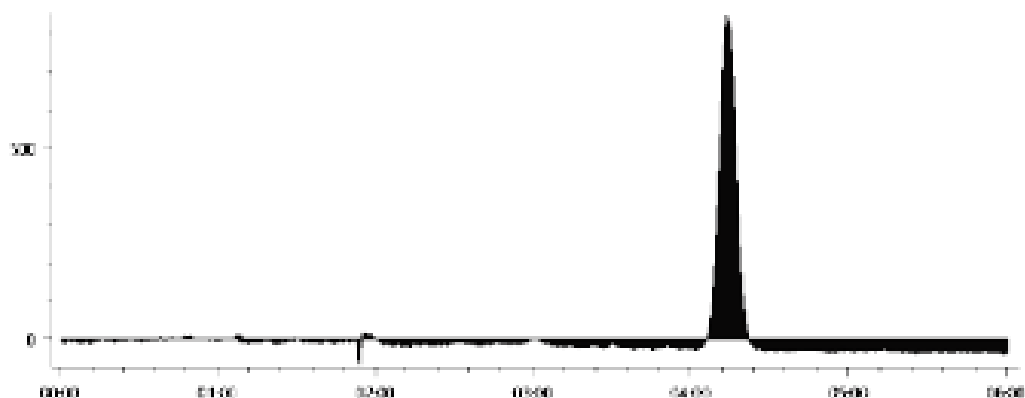

| # | Compound | Retention Time | Area   | % Area | Height |
|---|----------|----------------|--------|--------|--------|
| 1 | 14d      | 04.140         | 5133.1 | 100.0  | 563.94 |

# miniLC

Method: 6 MINUTE ISOCRATIC 80% acn  
 Batch: LK  
 Sample: MSU-MLG-1-100  
 User: Guest  
 SN: 0118000000  
 Date: 11/30/2022 4:31 AM

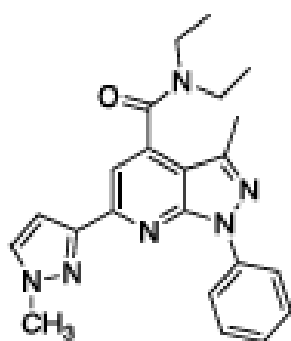

14e

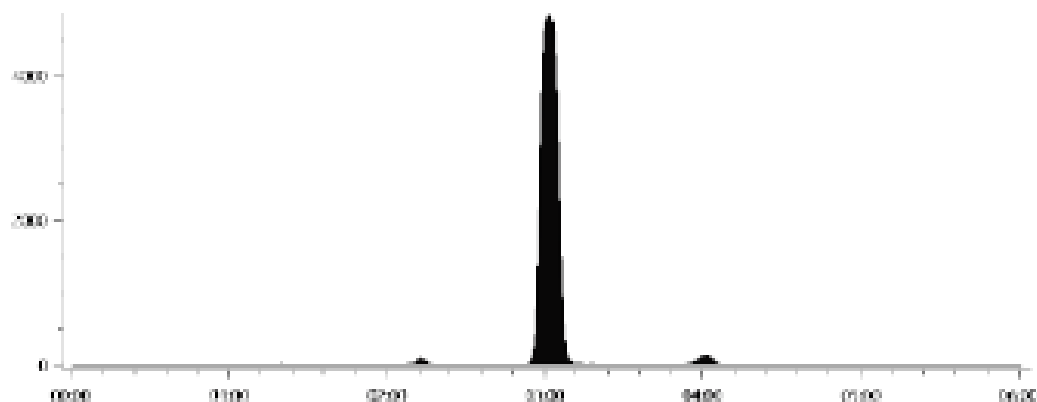

| # | Compound | Retention Time | Area    | % Area | Height  |
|---|----------|----------------|---------|--------|---------|
| 1 |          | 02.130         | 816.6   | 1.0    | 95.65   |
| 2 |          | 03.015         | 35370.5 | 96.7   | 4817.22 |
| 3 |          | 04.005         | 600.4   | 2.3    | 131.12  |

# miniLC

Method: 6-MINUTE ISOCRATIC 80% acn  
 Batch: UY  
 Sample: MS11-15H-1-58  
 Use: Control  
 SN: 0118000000  
 Date: 11/30/2022 12:16 AM

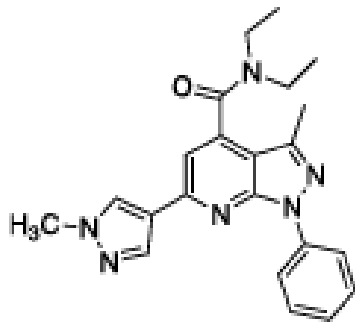

14f

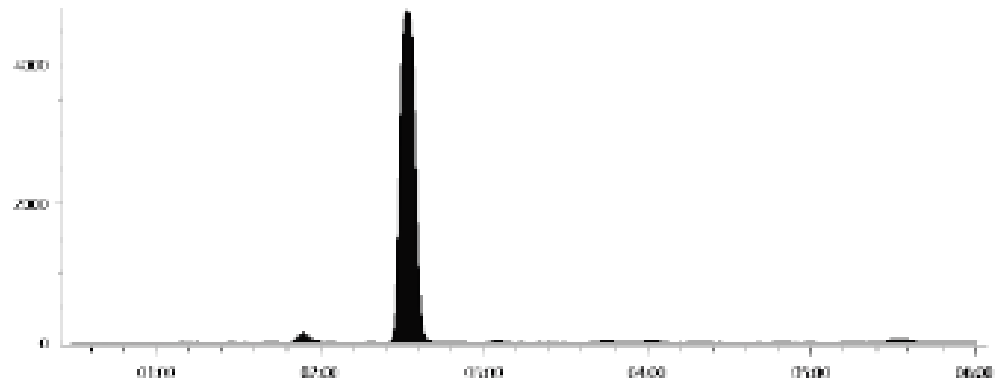

| # | Compound | Retention Time | Area    | % Area | Height  |
|---|----------|----------------|---------|--------|---------|
| 1 |          | 01:54.5        | 545.1   | 1.8    | 125.34  |
| 2 |          | 02:32.0        | 32351.4 | 96.8   | 4756.92 |
| 3 |          | 03:32.5        | 426.0   | 1.4    | 51.36   |

# miniLC

Method: 6-MINUTE ISOCRATIC 80% acn  
 Batch: K  
 Sample: MS11-SMC2-41  
 Use: Control  
 SN: 0118000000  
 Date: 11/12/2022 12:13 AM

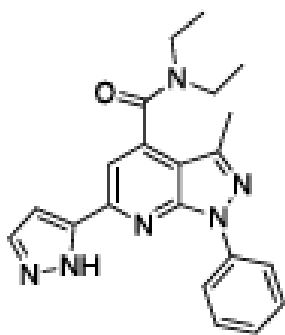

14g

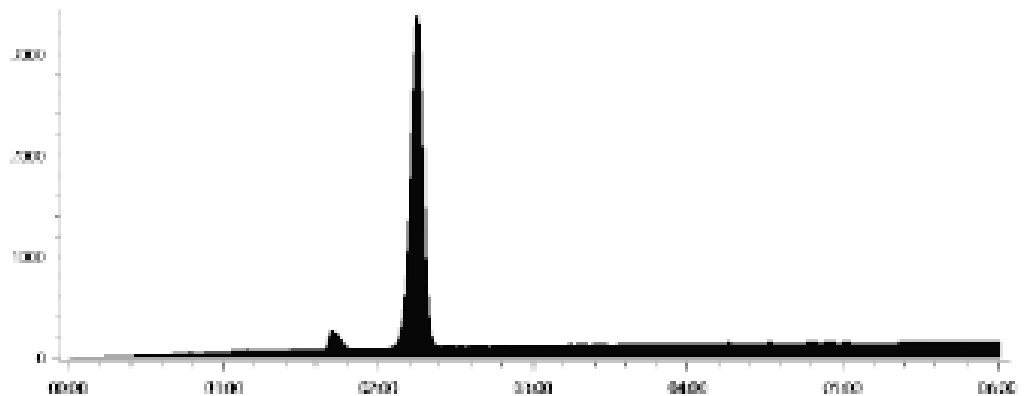

| # | Compound | Retention Time | Area    | % Area | Height  |
|---|----------|----------------|---------|--------|---------|
| 1 |          | 01:43.0        | 784.0   | 3.7    | 194.81  |
| 2 |          | 02:15.5        | 19772.4 | 96.3   | 3252.82 |



# miniLC

Method: 6 MINUTE ISOCRATIC 80% acn  
Batch: UY  
Sample: MSU-TSR-1-3  
User: Guest  
SN: 0118000000  
Date: 11/20/2022 12:31 AM

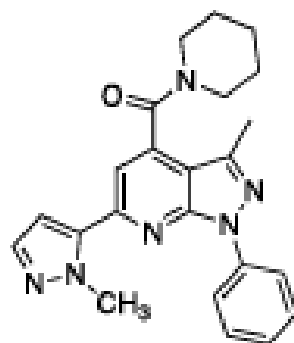

14h

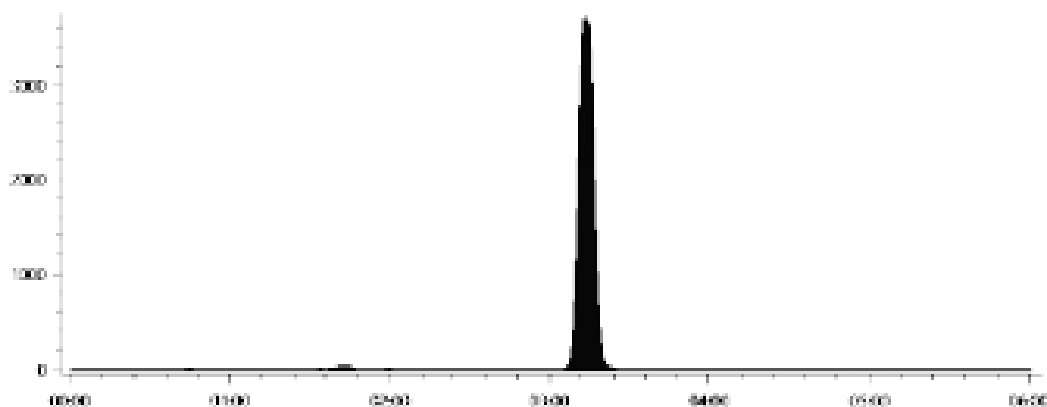

| # | Compound | Retention Time | Area    | % Area | Height  |
|---|----------|----------------|---------|--------|---------|
| 1 |          | 03:14.0        | 22521.2 | 100.0  | 3724.79 |

# miniLC

Method: 6 MINUTE ISOCRATIC 80% acn  
Batch: J11  
Sample: MSU-MLC-1-106  
User: Administrator  
SN: 0118000000  
Date: 11/18/2022 11:48 PM

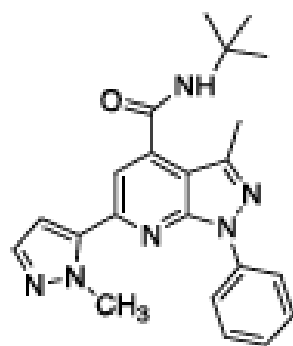

14i

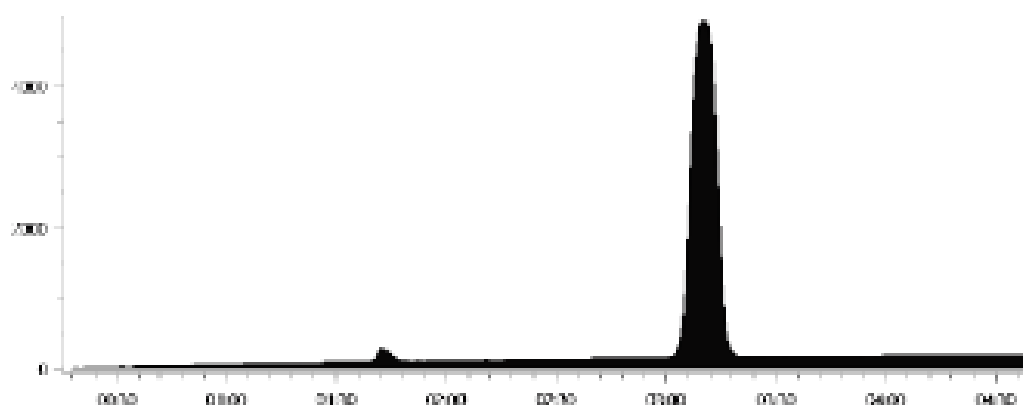

| # | Compound | Retention Time | Area    | % Area | Height  |
|---|----------|----------------|---------|--------|---------|
| 1 |          | 01:43.5        | 762.2   | 2.1    | 151.69  |
| 2 |          | 03:10.5        | 35349.9 | 97.9   | 4773.29 |

# miniLC

Method: 5 MINUTE ISOCRATIC 80% acn  
 Batch: MSU-MLC-1-198  
 Sample: MSU-MLC-1-198  
 User: Administrator  
 S/N: 0118000000  
 Date: 11/17/2022 12:30 AM

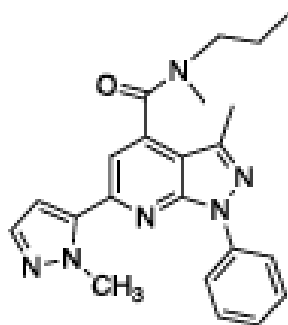

14j

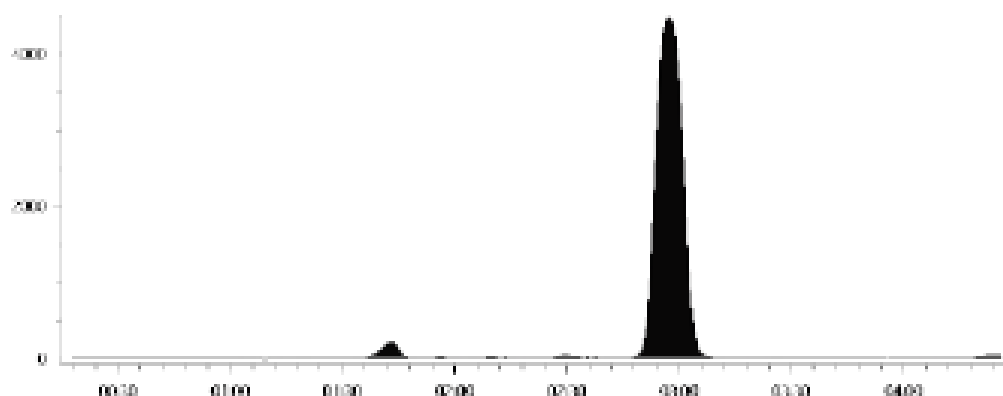

| # | Compound | Retention Time | Area    | % Area | Height  |
|---|----------|----------------|---------|--------|---------|
| 1 |          | 01:43.0        | 1065.7  | 2.9    | 200.37  |
| 2 |          | 02:57.5        | 36273.6 | 97.1   | 4460.43 |

# miniLC

Method: 5 MINUTE ISOCRATIC 80% acn  
 Batch: 1-K  
 Sample: MSU-MLC-1-199  
 User: Guest  
 S/N: 0118000000  
 Date: 11/30/2022 4:54 AM

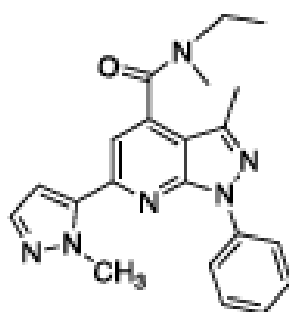

14k

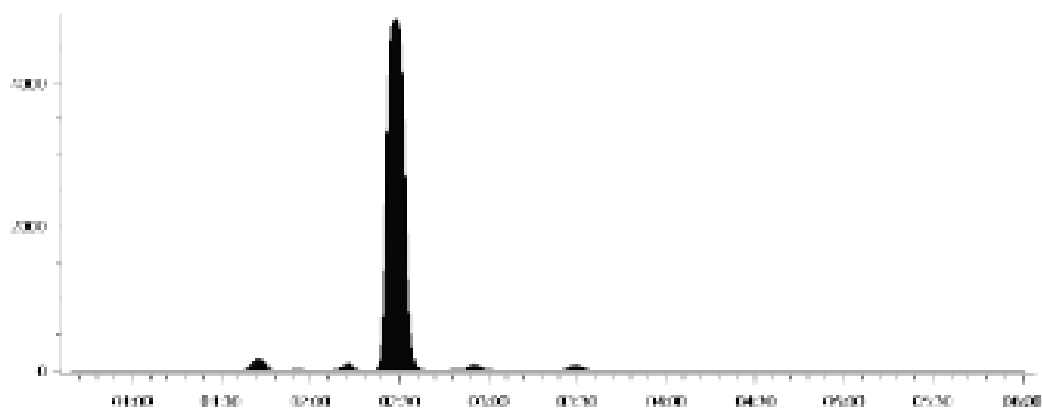

| # | Compound | Retention Time | Area    | % Area | Height  |
|---|----------|----------------|---------|--------|---------|
| 1 |          | 02:12.5        | 439.1   | 1.5    | 103.29  |
| 2 |          | 02:28.5        | 31401.4 | 95.9   | 4878.04 |
| 3 |          | 02:55.0        | 449.7   | 1.4    | 67.15   |
| 4 |          | 03:29.5        | 166.5   | 1.2    | 77.05   |

# miniLC

Method: 6-MINUTE ISOCRA TIC 80% acn  
 Batch: A  
 Sample: MSU-SMU-1-067AA  
 User: Administrator  
 S/N: 0118000000  
 Date: 09/16/2012 1:41 AM

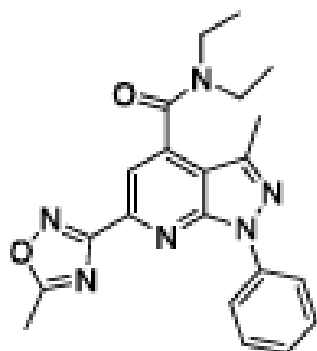

15

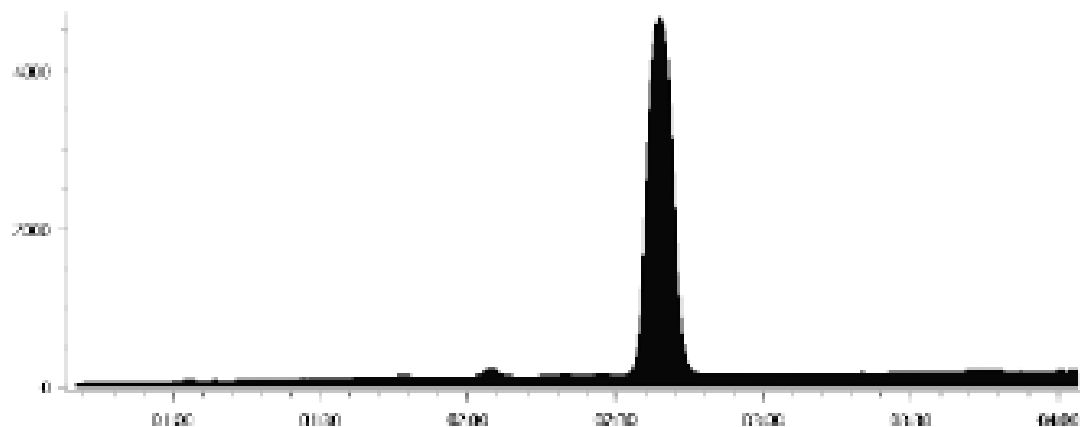

| # | Compound | Retention Time | Area    | % Area | Height  |
|---|----------|----------------|---------|--------|---------|
| 1 |          | 02:04.5        | 965.1   | 1.4    | 92.28   |
| 2 |          | 02:25.0        | 25156.2 | 98.6   | 4498.05 |

# miniLC

Method: 6-MINUTE ISOCRA TIC 80% acn  
 Batch: ISOCRA TIC ANAL Y1202  
 Sample: MSU-SMU-1-145AAA  
 User: Administrator  
 S/N: 0118000000  
 Date: 09/16/2012 1:23 AM

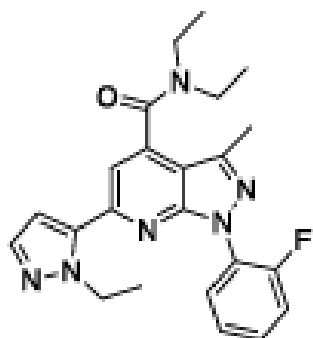

18a

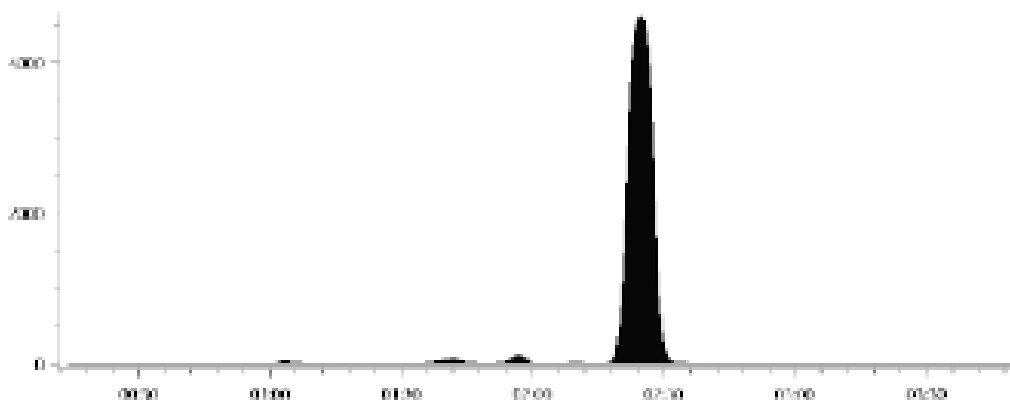

| # | Compound | Retention Time | Area    | % Area | Height  |
|---|----------|----------------|---------|--------|---------|
| 1 |          | 01:41.5        | 488.6   | 1.6    | 68.57   |
| 2 |          | 01:56.5        | 516.9   | 1.7    | 110.25  |
| 3 |          | 02:24.5        | 29796.3 | 96.7   | 4603.42 |

# miniLC

Method: 6-MINUTE ISOCRATIC 80% acn  
 Batch: LF7  
 Sample: MS11-15H-1-43  
 User: Guest  
 S/N: 0118000000  
 Date: 11/30/2012 12:23 AM

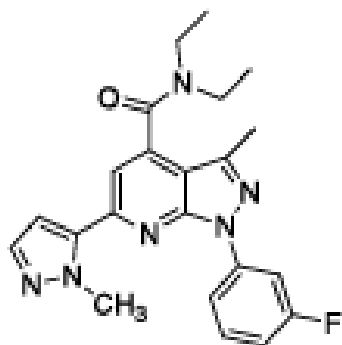

18b

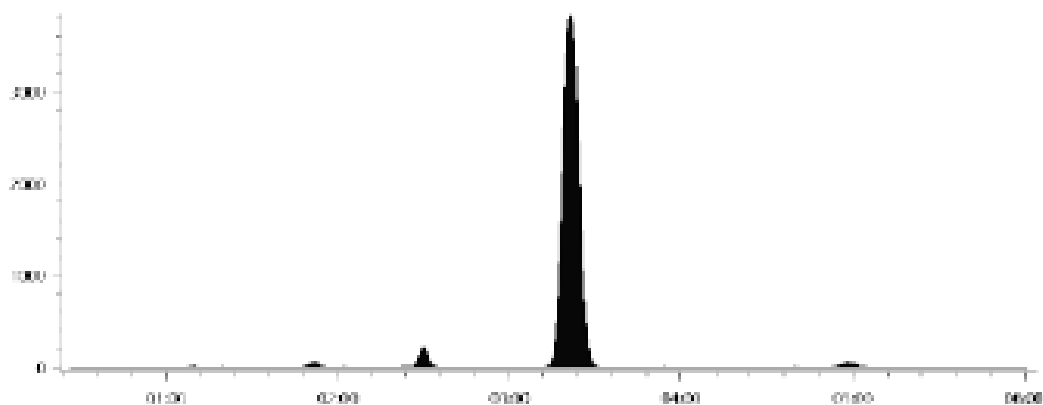

| # | Compound | Retention Time | Area    | % Area | Height  |
|---|----------|----------------|---------|--------|---------|
| 1 |          | 01:52.0        | 239.3   | 0.9    | 50.27   |
| 2 |          | 02:30.0        | 634.7   | 3.3    | 199.78  |
| 3 |          | 03:21.5        | 24328.1 | 94.3   | 3622.70 |
| 4 |          | 04:59.0        | 407.5   | 1.6    | 125.65  |

# miniLC

Method: 6-MINUTE ISOCRATIC 80% acn  
 Batch: AB  
 Sample: MS11-15H-1-43  
 User: Administrator  
 S/N: 0118000000  
 Date: 11/29/2012 4:16 AM

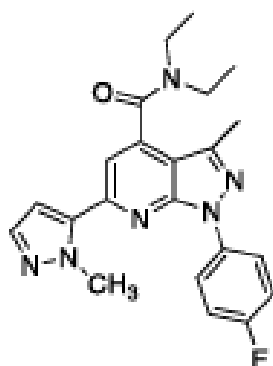

18c

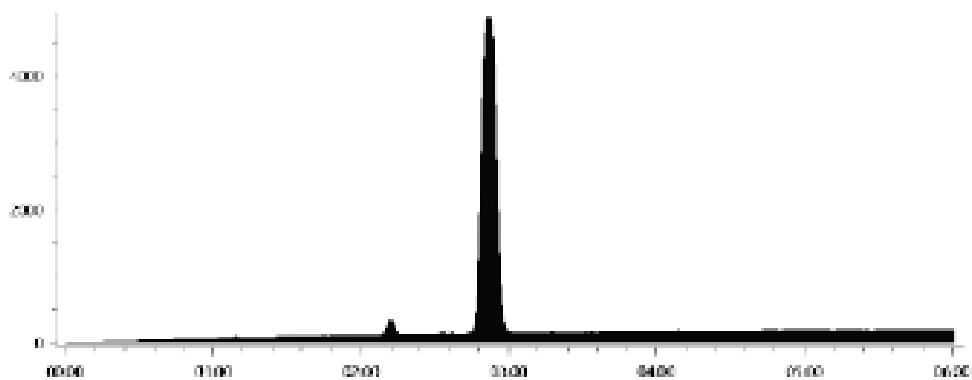

| # | Compound | Retention Time | Area    | % Area | Height  |
|---|----------|----------------|---------|--------|---------|
| 1 |          | 02:12.0        | 1642.4  | 2.3    | 274.16  |
| 2 |          | 02:52.0        | 33036.2 | 97.7   | 4736.27 |

# miniLC

Method: 6 MINUTE ISOCRATIC 80% acn  
 Hatch: J  
 Sample: MSU-SMQ-1-150  
 User: Gwend  
 S/N: 0118000000  
 Date: 11/11/2022 11:36 PM

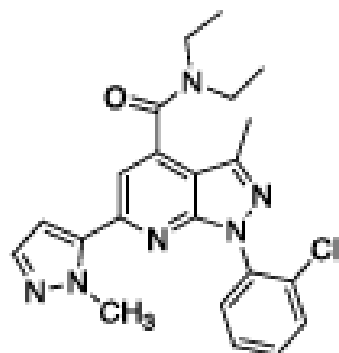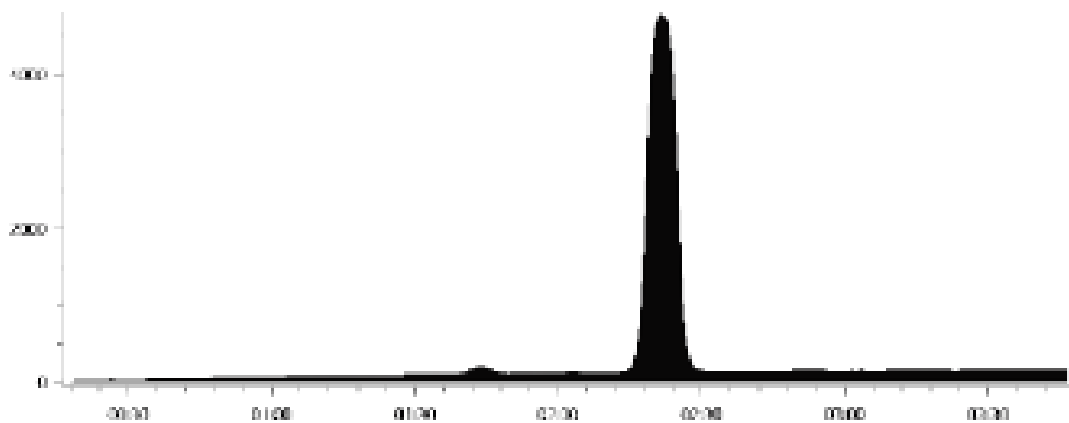

18d

| # | Compound | Retention Time | Area    | % Area | Height  |
|---|----------|----------------|---------|--------|---------|
| 1 |          | 01:44.0        | 438.7   | 1.4    | 50.47   |
| 2 |          | 02:21.5        | 30471.8 | 98.6   | 4627.16 |

# miniLC

Method: 6 MINUTE ISOCRATIC 80% acn  
 Hatch: kj  
 Sample: MSU-15H-1-50  
 User: Gwend  
 S/N: 0118000000  
 Date: 11/09/2022 11:36 PM

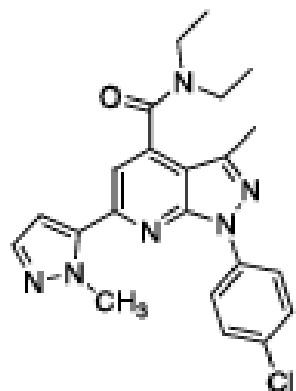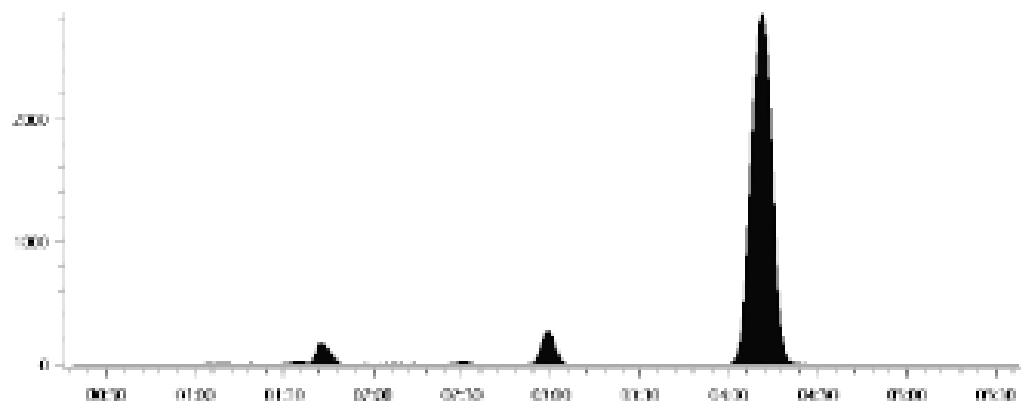

18e

| # | Compound | Retention Time | Area    | % Area | Height  |
|---|----------|----------------|---------|--------|---------|
| 1 |          | 01:43.0        | 750.4   | 3.0    | 147.89  |
| 2 |          | 02:59.0        | 1385.0  | 5.6    | 265.61  |
| 3 |          | 04:11.0        | 22693.3 | 91.4   | 2844.40 |

# miniLC

Method: 6 MINUTE ISOCRATIC 80% acn  
 Batch: M  
 Sample: MSU-SMQ-1-80  
 User: Guest  
 S/N: 0118000000  
 Date: 11/09/2022 1:07 AM

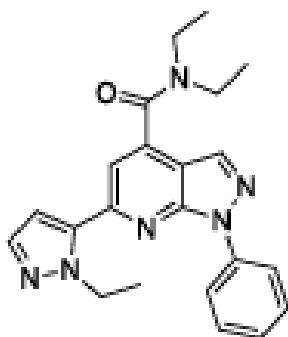

20a

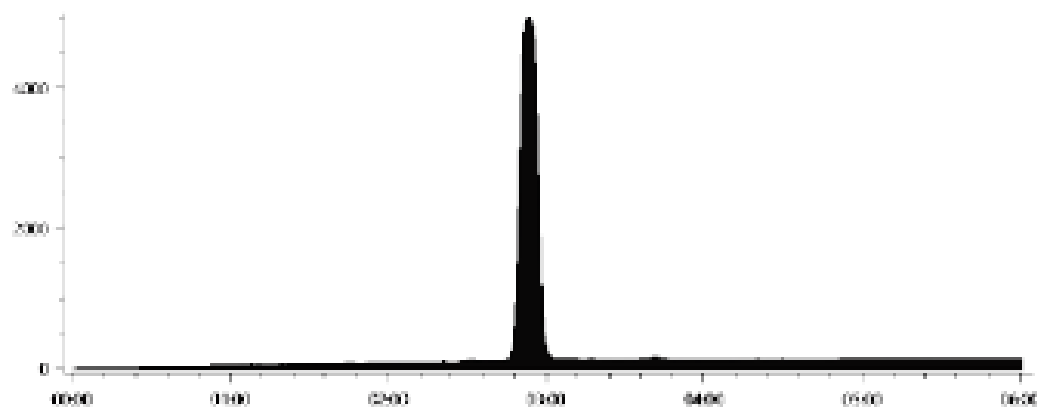

| # | Compound | Retention Time | Area    | % Area | Height  |
|---|----------|----------------|---------|--------|---------|
| 1 |          | 02:53.5        | 47378.6 | 100.0  | 4940.43 |

# miniLC

Method: 6 MINUTE ISOCRATIC 80% acn  
 Batch: U  
 Sample: MSU-SMQ-1-100  
 User: Guest  
 S/N: 0118000000  
 Date: 11/11/2022 11:06 PM

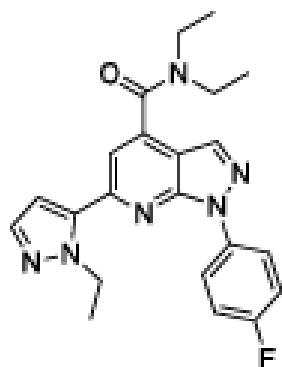

20b

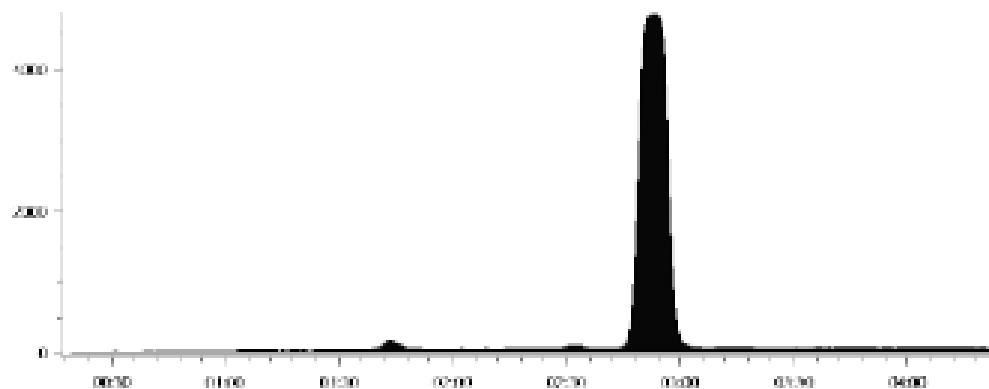

| # | Compound | Retention Time | Area    | % Area | Height  |
|---|----------|----------------|---------|--------|---------|
| 1 |          | 01:43.5        | 690.9   | 1.7    | 126.81  |
| 2 |          | 02:32.0        | 221.5   | 0.5    | 50.06   |
| 3 |          | 02:53.0        | 40518.1 | 97.8   | 4694.40 |

23a

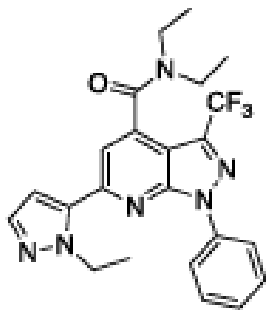

### miniLC

Method: 6-MINUTE-ISOCRATIC-80% acn  
Batch: J  
Sample: MSU-SMG-1-155  
User: Cassel  
S/N: 0118000000  
Date: 02/03/2023 10:15 AM

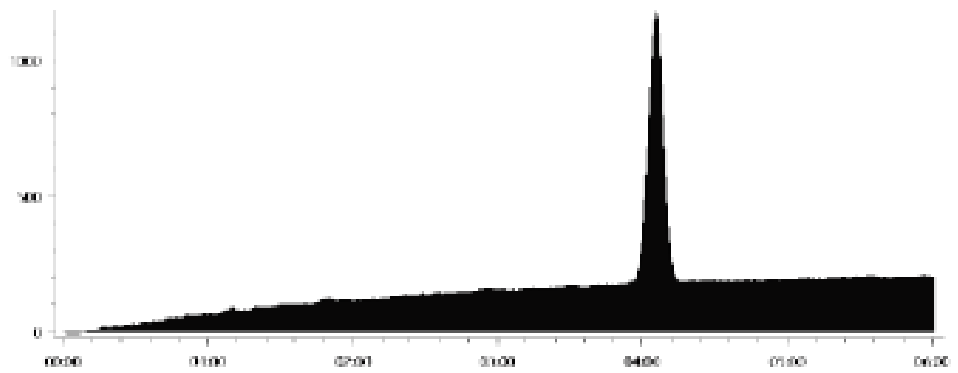

| # | Compound | Retention Time | Area    | % Area | Height  |
|---|----------|----------------|---------|--------|---------|
| 1 |          | 04:05.5        | 17695.4 | 100.0  | 1075.32 |

### miniLC

Method: 6-MINUTE-ISOCRATIC-80% acn  
Batch: M  
Sample: MSU-SMG-2-57  
User: Cassel  
S/N: 0118000000  
Date: 01/27/2023 10:49 PM

23b

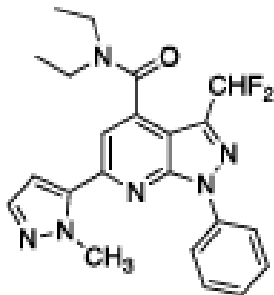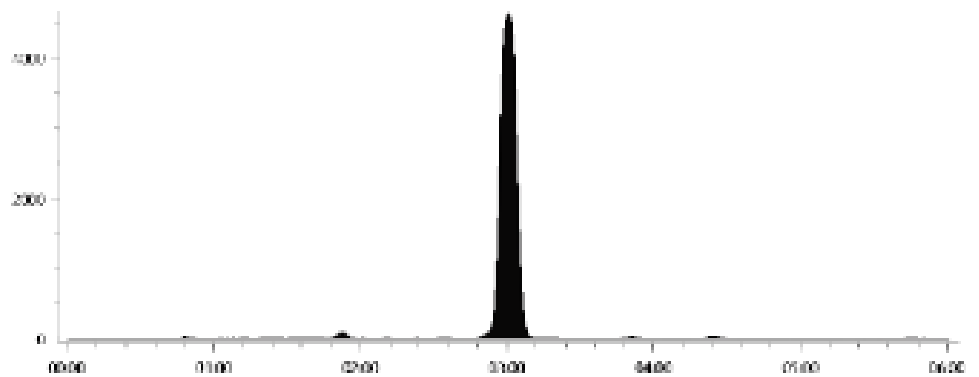

| # | Compound | Retention Time | Area    | % Area | Height  |
|---|----------|----------------|---------|--------|---------|
| 1 |          | 03:02.5        | 1121.2  | 1.0    | 89.76   |
| 2 |          | 03:02.5        | 35279.4 | 99.0   | 4638.15 |

# miniLC

Method: 6 MINUTE: 100%IPA:10: 80% acn  
Batch: 011  
Sample: MS11-SM02-2154  
User: Admin  
S/N: 0118000000  
Date: 05/02/2023 4:45 PM

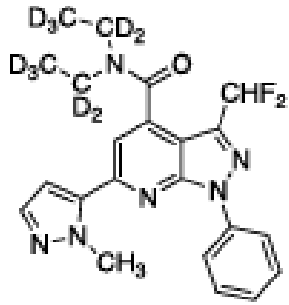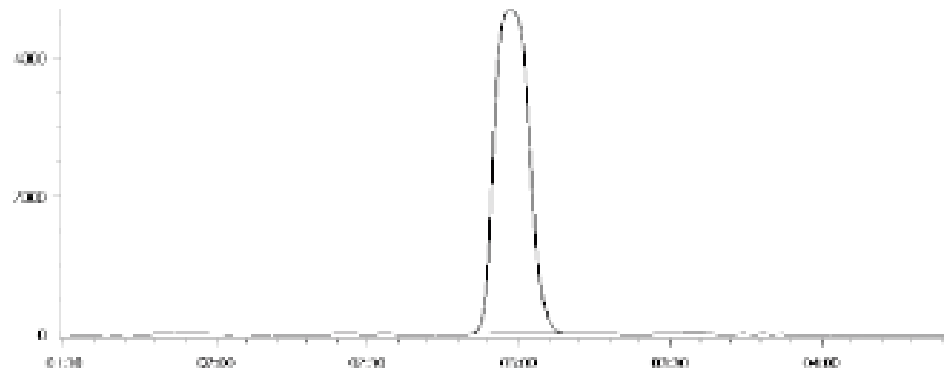

| # | Compound | Retention Time | Area    | % Area | Height  |
|---|----------|----------------|---------|--------|---------|
| 1 |          | 02:58.5        | 37354.3 | 100.0  | 4676.43 |

25



# Mass spectrum of 25

## ==== Shimadzu LabSolutions Data Report ====

### <Spectrum>

Line#:1 R.Time:11.817(Scan#:710)  
MassPeaks:500  
RawMode:Single 11.817(710) BasePeak:435(5905113)  
BG Mode:None Segment 1 - Event 1

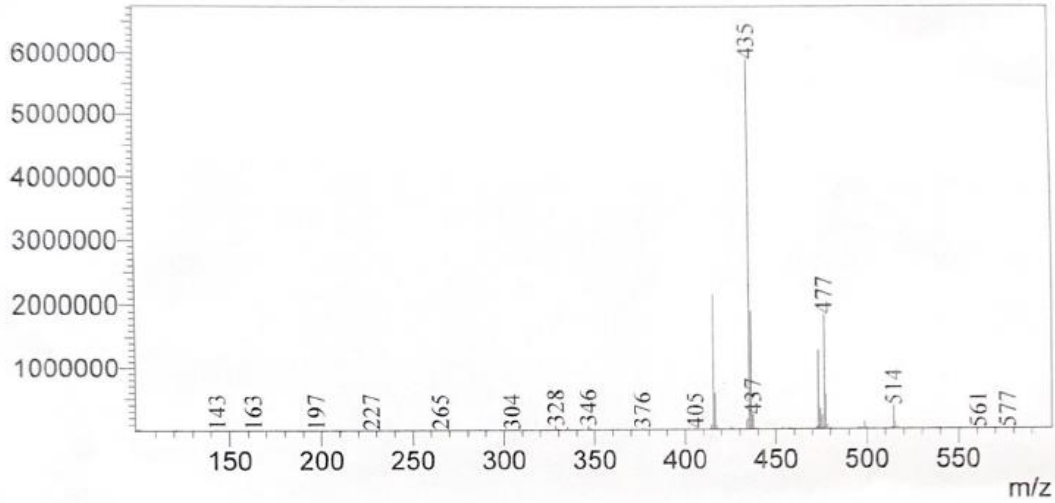

Expanded PDE Selectivity Screening 14b & 23b

Table S-1 Inhibitory Effects of the Compounds on PDE Activities

| Inhibitors                            | % Inhibition |        |        |        |        |       |        |        |         |         |
|---------------------------------------|--------------|--------|--------|--------|--------|-------|--------|--------|---------|---------|
|                                       | PDE4A1A      | PDE4B1 | PDE4C1 | PDE4D7 | PDE7A1 | PDE7B | PDE8A1 | PDE9A2 | PDE10A1 | PDE10A2 |
| SMQ-2-057 (23b), 1 μM                 | 1            | 5      | 15     | 16     | 2      | 1     | 1      | 1      | 4       | 2       |
| SMQ-2-057 (23b), 10 μM                | 24           | 14     | 34     | 33     | 2      | 51    | 11     | 2      | 10      | 3       |
| SMQ-1-148 (14b), 1 μM                 | 5            | 2      | 14     | 1      | 0      | 0     | 1      | 2      | 3       | 2       |
| SMQ-1-148 (14b), 10 μM                | 8            | 4      | 36     | 5      | 8      | 3     | 7      | 1      | 5       | 6       |
| Apremilast ~ 0.1 x IC <sub>50</sub>   | 9            | 10     | 8      | 8      | -      | -     | -      | -      | -       | -       |
| Apremilast ~ 1 x IC <sub>50</sub>     | 50           | 54     | 41     | 53     | -      | -     | -      | -      | -       | -       |
| Apremilast ~ 10 x IC <sub>50</sub>    | 93           | 94     | 87     | 93     | -      | -     | -      | -      | -       | -       |
| BRL-50481 ~ 0.1 x IC <sub>50</sub>    | -            | -      | -      | -      | 9      | -     | -      | -      | -       | -       |
| BRL-50481 ~ 1 x IC <sub>50</sub>      | -            | -      | -      | -      | 51     | -     | -      | -      | -       | -       |
| BRL-50481 ~ 10 x IC <sub>50</sub>     | -            | -      | -      | -      | 93     | -     | -      | -      | -       | -       |
| Dipyridamole ~ 0.1 x IC <sub>50</sub> | -            | -      | -      | -      | -      | 10    | 10     | -      | -       | -       |
| Dipyridamole ~ 1 x IC <sub>50</sub>   | -            | -      | -      | -      | -      | 48    | 50     | -      | -       | -       |
| Dipyridamole ~ 10 x IC <sub>50</sub>  | -            | -      | -      | -      | -      | 86    | 89     | -      | -       | -       |
| Bay 73-6691 ~ 0.1 x IC <sub>50</sub>  | -            | -      | -      | -      | -      | -     | -      | 8      | -       | -       |
| Bay 73-6691 ~ 1 x IC <sub>50</sub>    | -            | -      | -      | -      | -      | -     | -      | 52     | -       | -       |
| Bay 73-6691 ~ 10 x IC <sub>50</sub>   | -            | -      | -      | -      | -      | -     | -      | 90     | -       | -       |
| Papaverine ~ 0.1 x IC <sub>50</sub>   | -            | -      | -      | -      | -      | -     | -      | -      | 11      | 9       |
| Papaverine ~ 1 x IC <sub>50</sub>     | -            | -      | -      | -      | -      | -     | -      | -      | 54      | 51      |
| Papaverine ~ 10 x IC <sub>50</sub>    | -            | -      | -      | -      | -      | -     | -      | -      | 91      | 95      |

## Cell Viability and Protein Expression in Cell-Based Assay

**Table S-2.** PDE11A4 protein expression (normalized by Ponceau staining and expressed as a fold-change of DMSO) measured in drug-treated transiently-transfected HT-22 cell samples used in the PDE assay confirms that the decrease in PDE11A4 catalytic activity caused by these compounds is not explained by a reduction in expression of the protein itself.

|               | <b>1</b>  | <b>14b</b> | <b>25</b> |
|---------------|-----------|------------|-----------|
| <b>DMSO</b>   | 1.0±0     | 1.0±0.14   | 1±0       |
| <b>0.1 µM</b> | 1.32±0.27 | 1.02±0.10  | 1.16±0.12 |
| <b>1 µM</b>   | 1.21±0.29 | 1.10±0.07  | 1.04±0.17 |
| <b>10 µM</b>  | 1.12±0.17 | 0.819±0.14 | 1.25±0.19 |
| <b>100 µM</b> | 0.94±0.03 | 0.78±0.10  | 1.19±0.12 |

Neither 1 (failed normality; ANOVA on Ranks:  $H(4)=1.04$ ,  $P=0.4$ ), 14b ( $F(4,15)=1.46$ ,  $P=0.263$ ) nor 25b ( $F(4,15)=0.56$ ,  $P=0.697$ ) significantly changed PDE11A4 protein expression. Data expressed as mean ±SEM.

**Table S-3.** The number of intact transiently transfected cells counted in a separate study of drug-treated HT-22 cells confirms that the decrease in PDE11A4 catalytic activity caused by these compounds is not explained by a loss of PDE11A4-expressing cells.

|               | <b>1</b>   | <b>14b</b> | <b>25</b> |
|---------------|------------|------------|-----------|
| <b>DMSO</b>   | 100±21.9   | 63.8±4.6   | 73±5      |
| <b>0.1 µM</b> | 92±6.2     | 51.2±4.3   | 77.5±7.2  |
| <b>1 µM</b>   | 86.5±12.7  | 53±3.7     | 92±7.3    |
| <b>10 µM</b>  | 88.3±12.3  | 61.8±4.0   | 78.5±9.1  |
| <b>100 µM</b> | 76.84±10.1 | 61.5±2.7   | 71.5±2.4  |

---

Sample images for quantification were taken using an inverted Leica microscope with a 10x objective. All cells within the field of view showing expression of the GFP-PDE11A4 recombinant protein were counted by an experimenter blind to treatment. Neither 1 (F(4,15)=0.38, P=0.817), 14b (F(5,18)=2.09, P=0.132) nor 25b (F(4,15)=1.50, P=0.251) significantly changed the total number of cells expressing PDE11A4 protein. Data expressed as mean  $\pm$ SEM.

---
